# Supplementary material for: Defective mitochondrial COX1 translation due to loss of COX14 function triggers ROS-induced inflammation in mouse liver
Source: Springer Nature journal article supplement (doi:10.1038/s41467-024-51109-y), 2024-08-12
Supplement: MOESM1 [file 41467_2024_51109_MOESM1_ESM.pdf › 41467_2024_51109_MOESM1_ESM.pdf]

### **Supplementary Figure 1. Altered protein pattern in COX14<sup>M19I</sup> mice**

**a** Multiple sequence alignment of sequencing reads of the *Cox14* allele from wild-type (WT), heterozygous and homozygous COX14<sup>M19I</sup> mice. **b** Western blot analysis of tissue lysates from WT and COX14<sup>M19I</sup> mice tissues with indicated antibodies. See quantification in Figure 1c, n=4. **c** Isolated mitochondria from indicated tissues of 24 week old mice, solubilized in 1% N-Dodecyl b-D-maltoside (DDM) and analyzed by BN-PAGE and western blotting to detect respiratory chain complex III (CIII) and complex IV (CIV) using antibodies against RIESKE and COX1 respectively, Means  $\pm$  SEM, n =4; Unpaired t test; ns = non-significant,  $p < 0.0001$ . Quantification presented at the bottom. Source data are provided as a Source Data file.

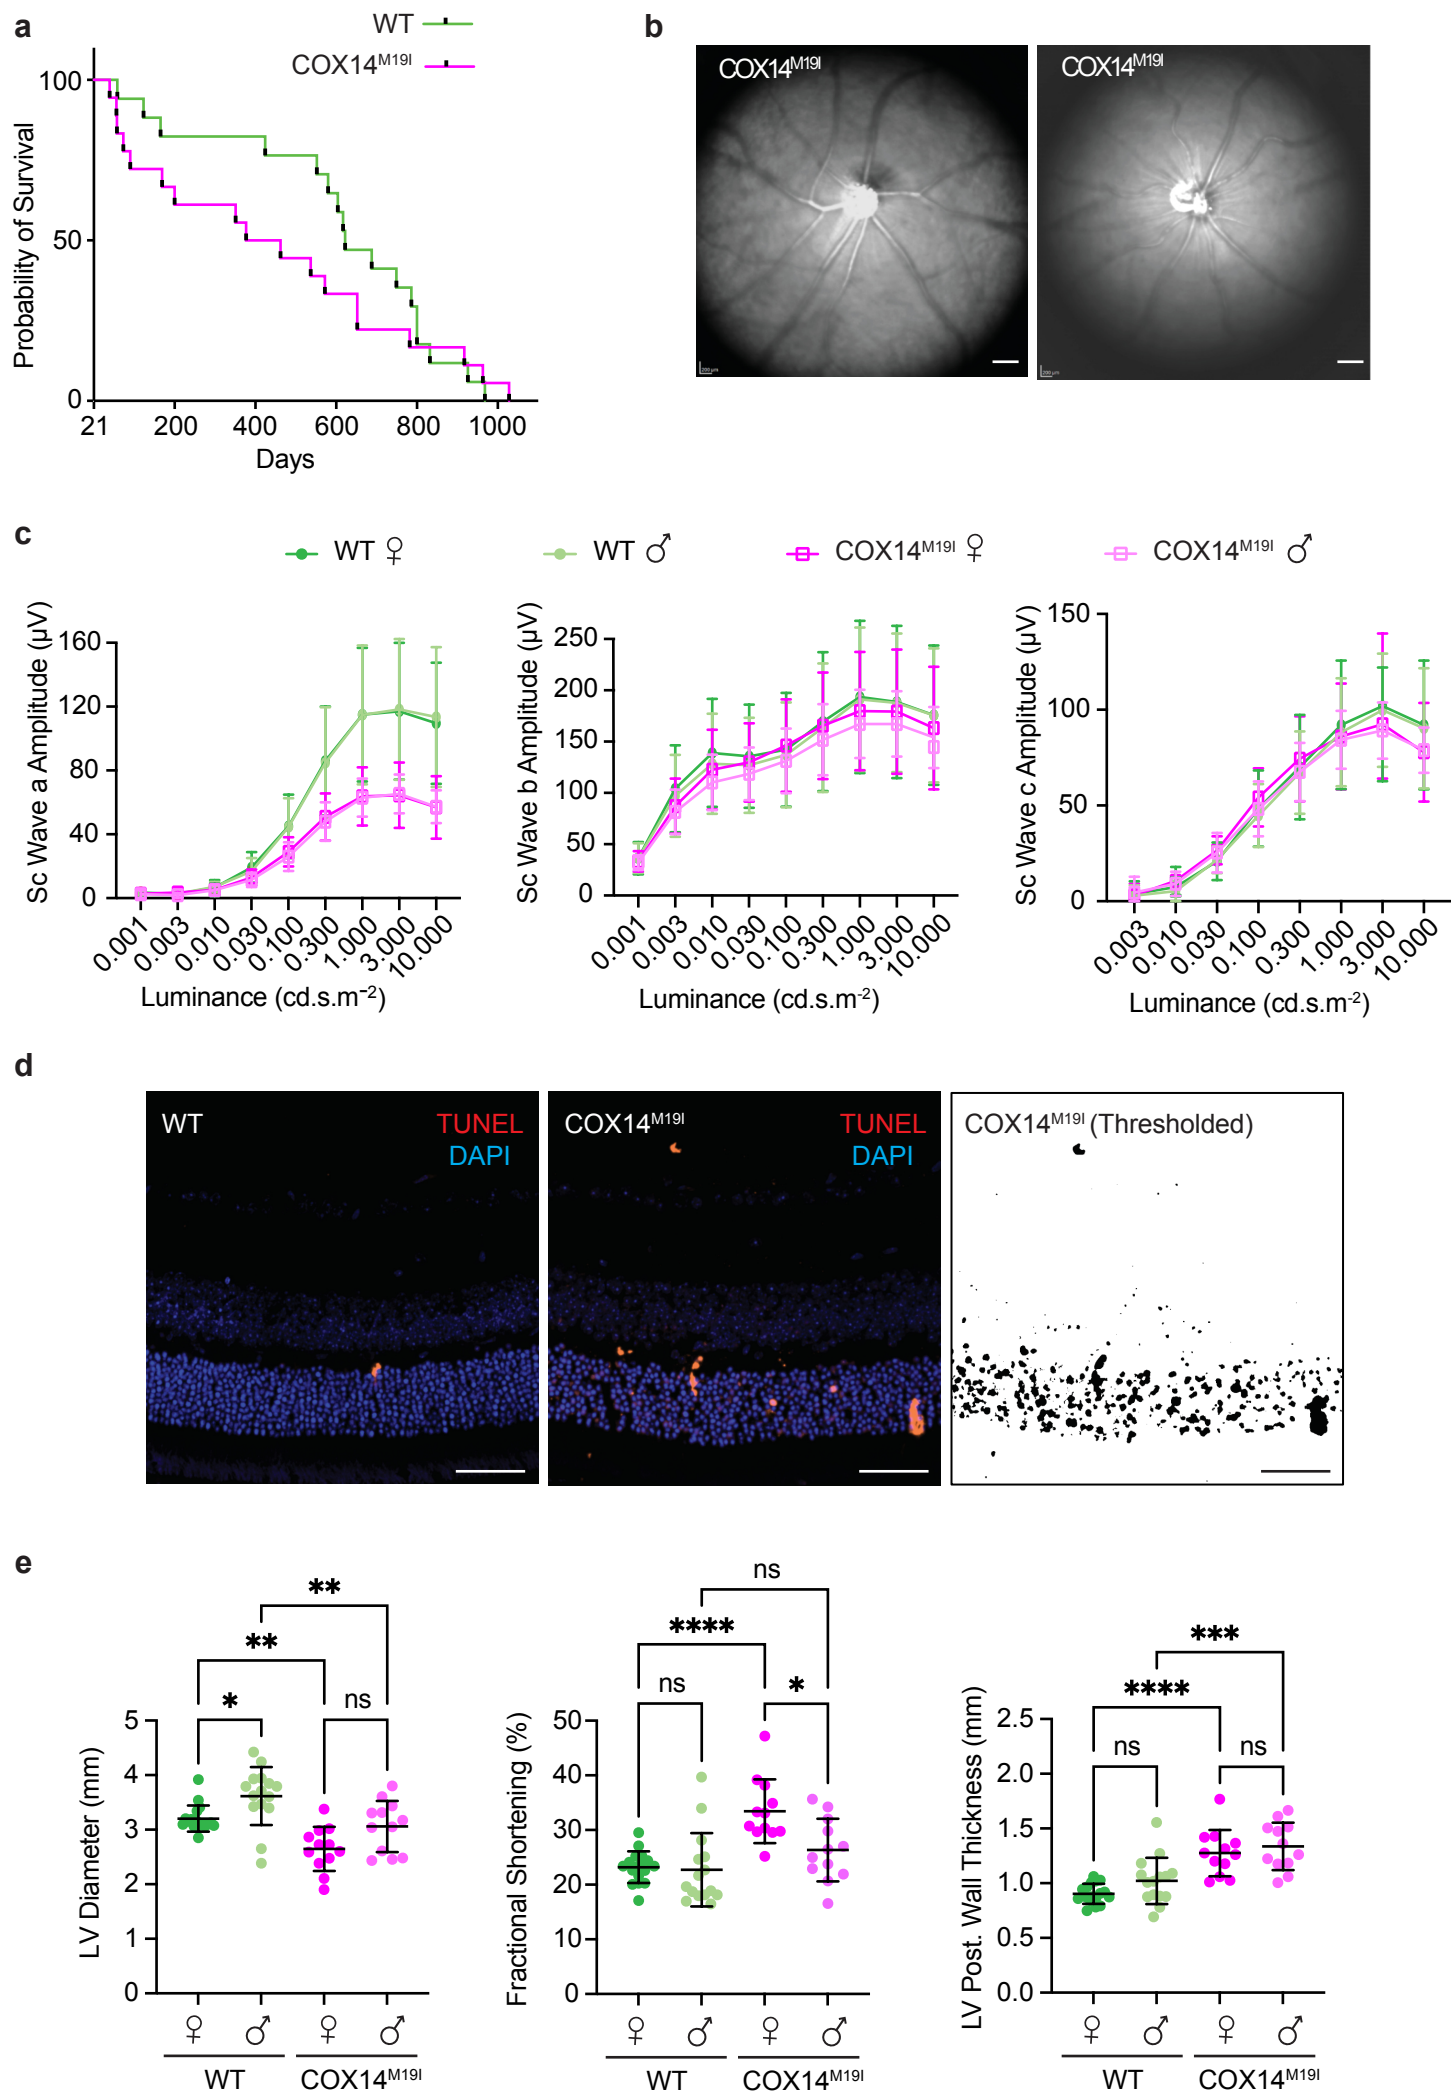

Supplementary Figure 2

## **Supplementary Figure 2. Pathophysiology of COX14<sup>M19I</sup> mice**

**a** Survival curve of WT and COX14<sup>M19I</sup> male mice. **b** Representative fundus images from COX14<sup>M19I</sup> eyes. Scale bar 400 $\mu$ m. **c** ERG Amplitude measurements as a response to increase in luminance in WT and COX14<sup>M19I</sup> males (M) and females (F) showing the scotopic waves, a (rod cells), b (ON-bipolar cells) and c (pigmented epithelium cells) recorded in 30 week old animals. **d** Retina of WT and COX14<sup>M19I</sup> mice showing TUNEL positive cells (orange) in the outer nuclear layer (ONL) and the inner nuclear layer (INL) at 30 weeks of age, n = 3. Scale bar 50 $\mu$ m. **e** Echocardiography (left panel, left ventricle diameter; middle panel, fractional shortening, right panel, left ventricle posterior wall thickness) of WT and COX14<sup>M19I</sup> mice. Means  $\pm$  SD, n=12, One-way ANOVA, ns=non-significant, left panel: WT females vs. WT males p = 0.0361; WT females vs. COX14<sup>M19I</sup> females p = 0.0046; WT males vs. COX14<sup>M19I</sup> males p = 0.0061, middle panel: WT females vs. COX14<sup>M19I</sup> females p < 0.0001; COX14<sup>M19I</sup> females vs. COX14<sup>M19I</sup> males p = 0.0111, right panel: WT females vs. COX14<sup>M19I</sup> females p < 0.0001; WT males vs. COX14<sup>M19I</sup> males p = 0.0003. Source data are provided as a Source Data file.



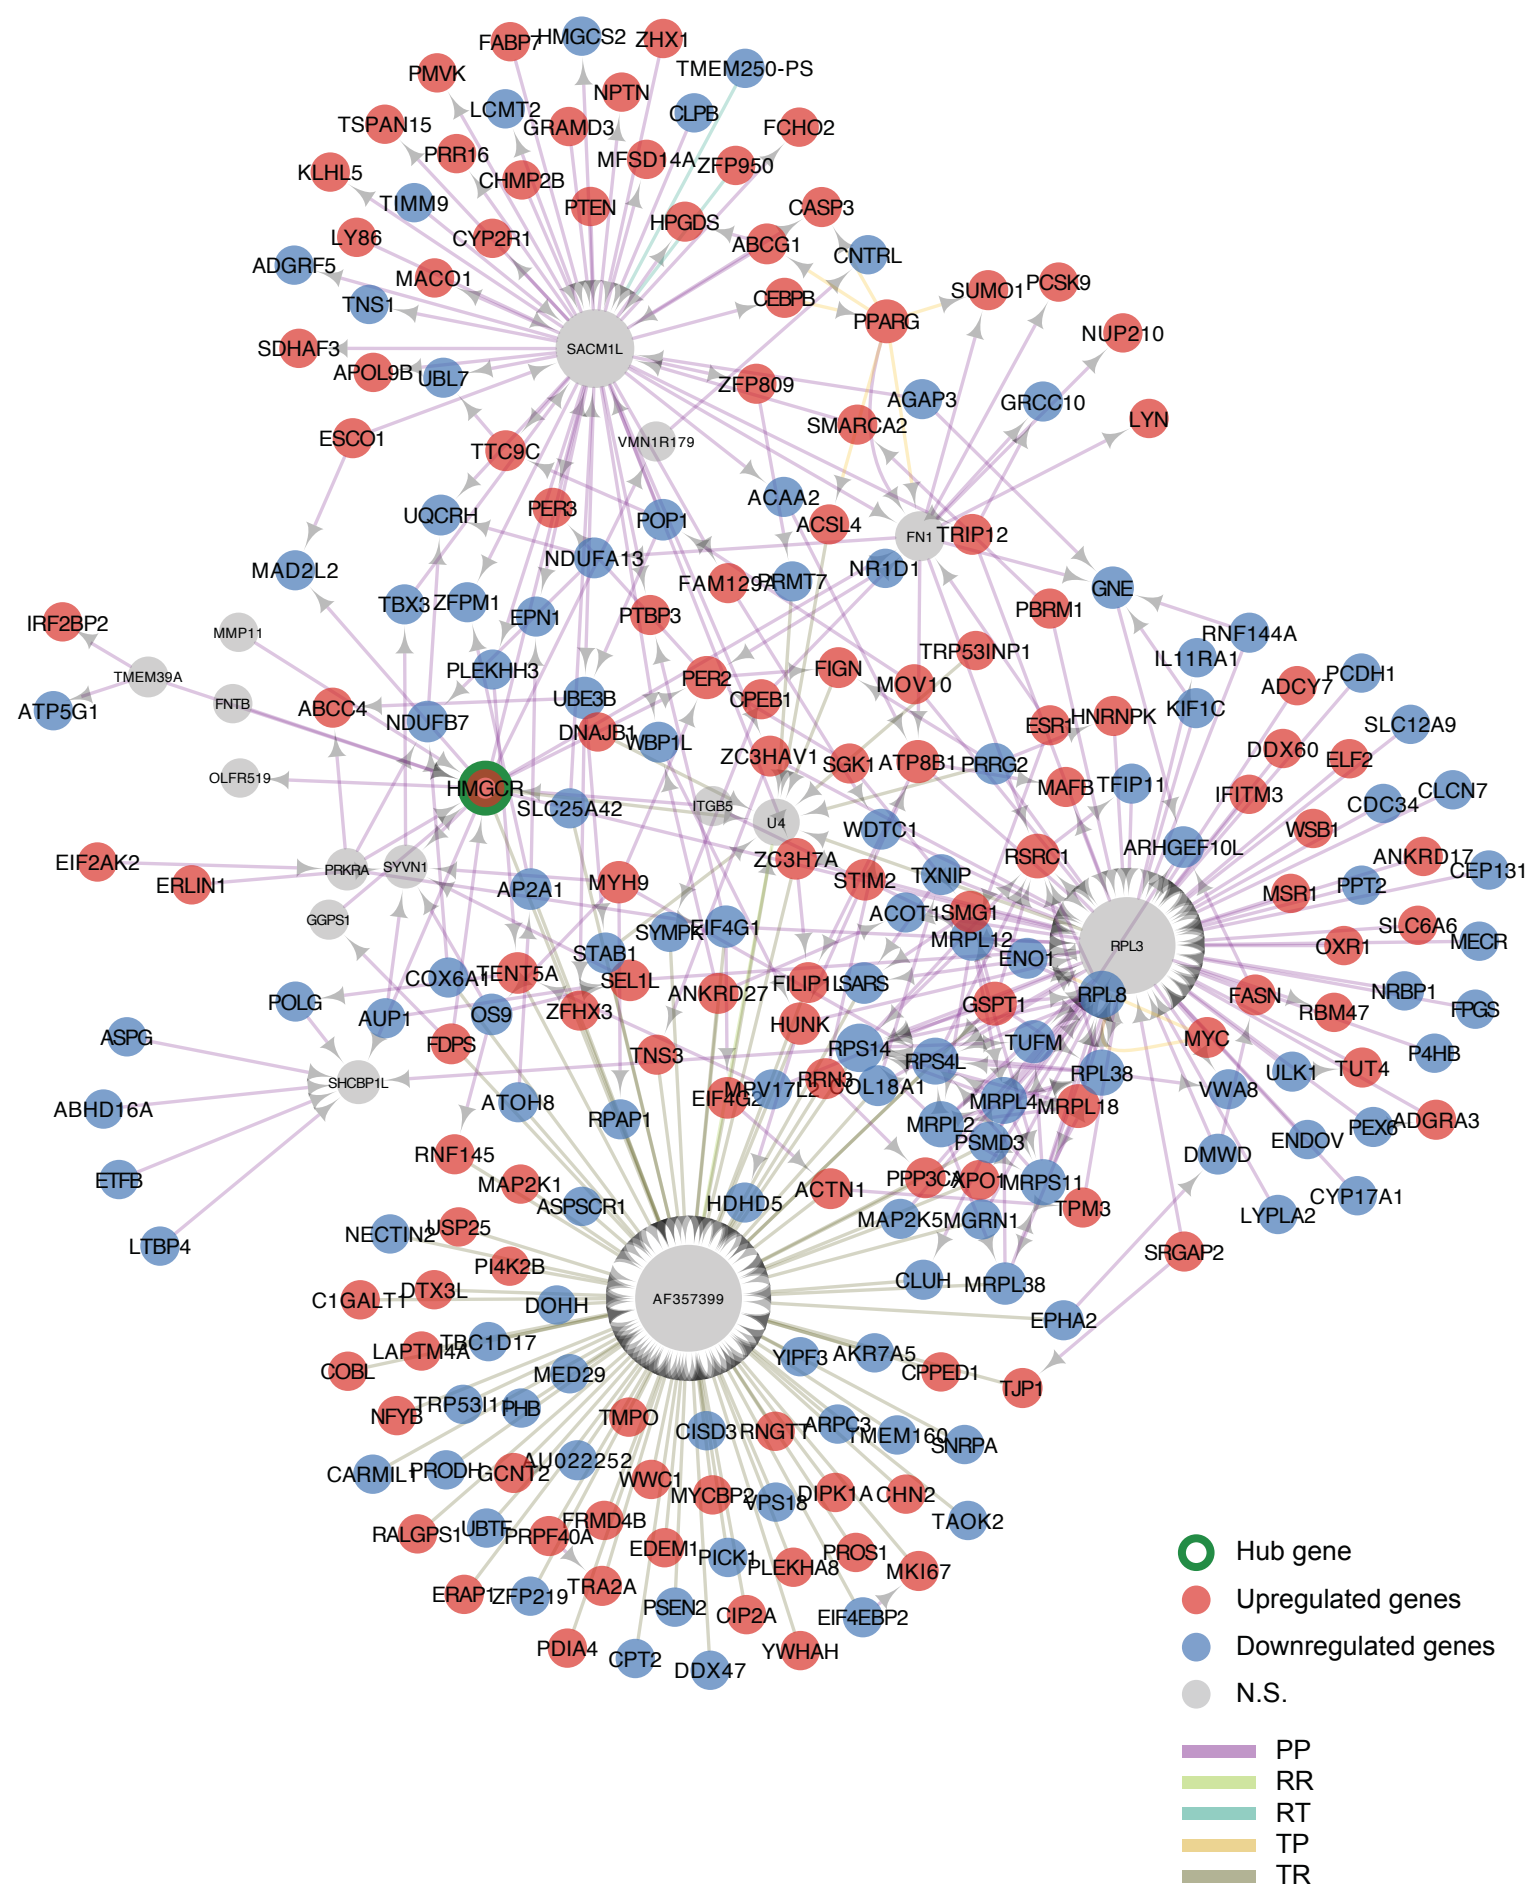

Supplementary Figure 3

### **Supplementary Figure 3. Interaction network analysis.**

Hmgcr interaction network, with first degree (direct) and second degree (neighbours of direct) connections of Hmgcr. (Green node: hub gene (Hmgcr); red nodes: upregulated genes in COX14<sup>M19I</sup> samples; blue nodes: downregulated genes in COX14<sup>M19I</sup> samples; grey nodes: interactors in the network which are not significantly up- or downregulated.) The different kinds of (directed) interactions considered were: protein-protein (PP), RNA-RNA (RR), transcription factor-protein (TP), transcription factor-RNA (TR) and RNA-transcription factor (RT) interactions. The size of the nodes denotes the degree (number of outgoing + incoming interactions).



**a**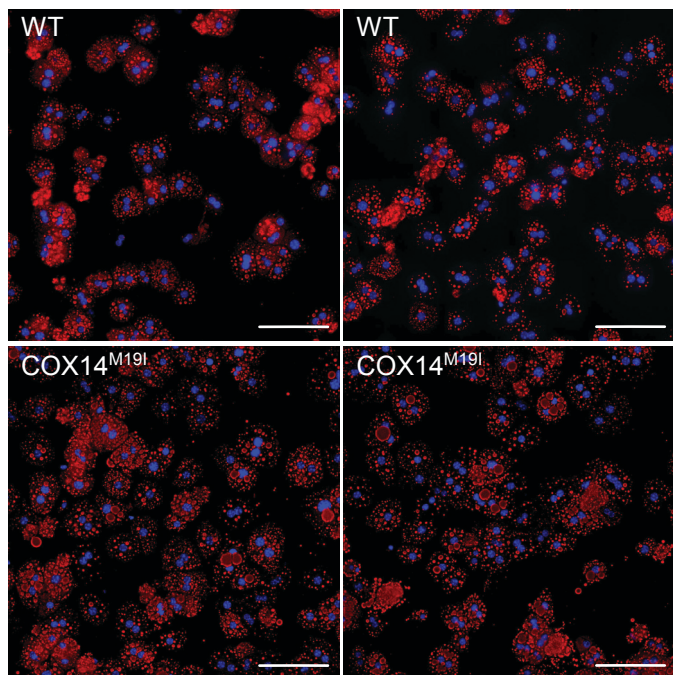**b**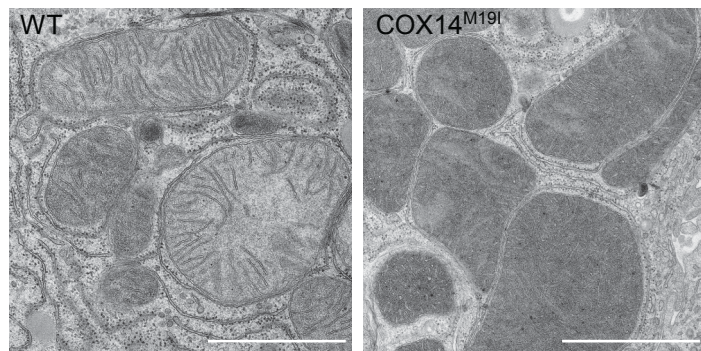**c**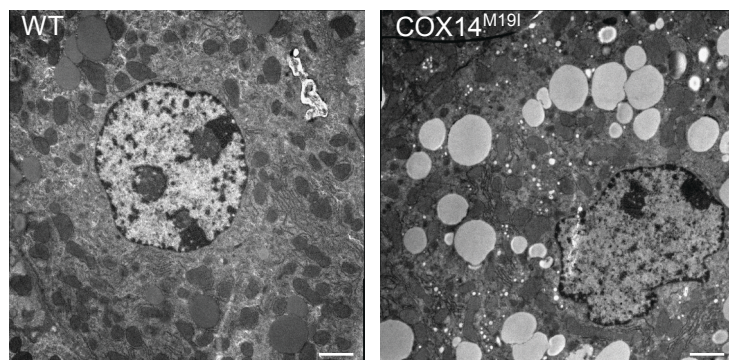**d**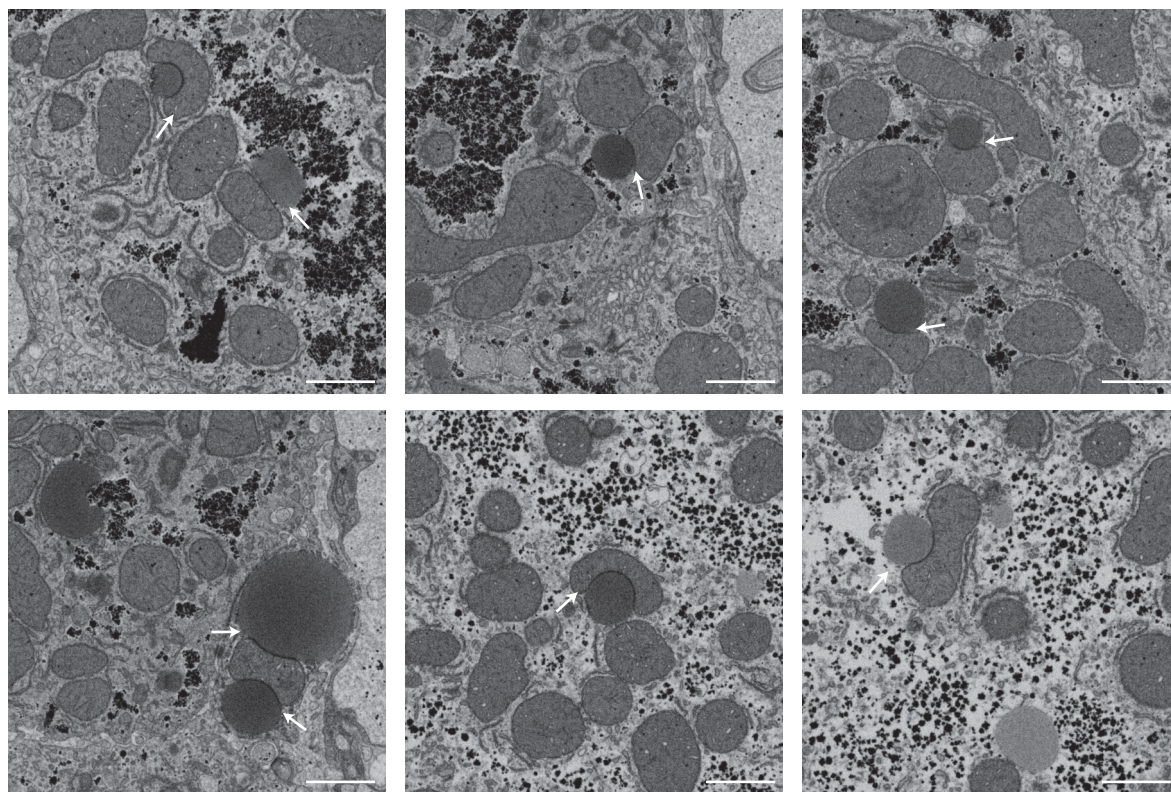**e**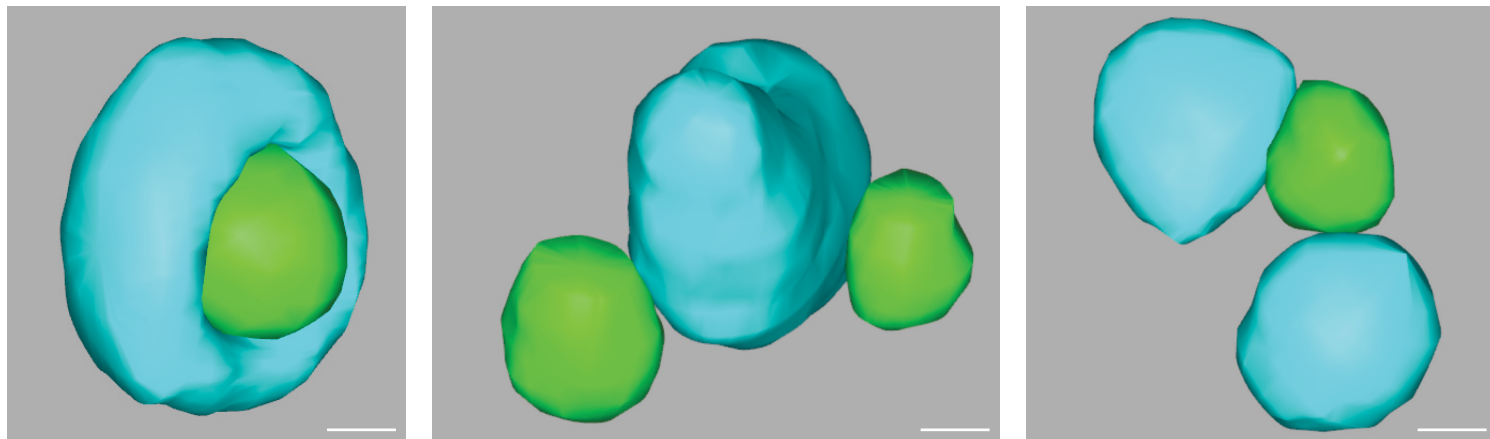

Supplementary Figure 4

## **Supplementary Figure 4. Altered mitochondrial organization in COX14<sup>M19I</sup> liver**

**a** Cytochemistry of isolated primary hepatocytes from WT and COX14<sup>M19I</sup> mice using Oil Red O. Scale bar 100μm. **b** Representative TEM images of isolated primary hepatocytes from WT and COX14<sup>M19I</sup> mice. Scale bar 500nm. **c** Representative TEM images of liver tissue samples from WT and COX14<sup>M19I</sup> mice. Scale bar 2μm. **d** Representative FIB-SEM images of liver tissue samples from COX14<sup>M19I</sup> mice. Scale bar 1μm. **e** Representative 3D reconstructions of interaction between mitochondrion and lipid bodies observed in FIB-SEM images of liver tissue samples from COX14<sup>M19I</sup> mice. Scale bar 250nm.



**a**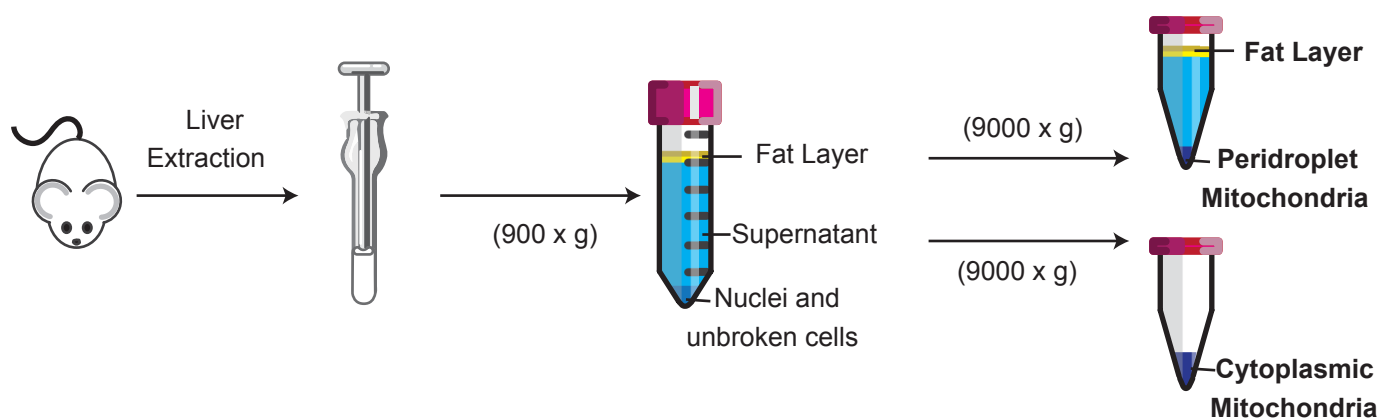**b**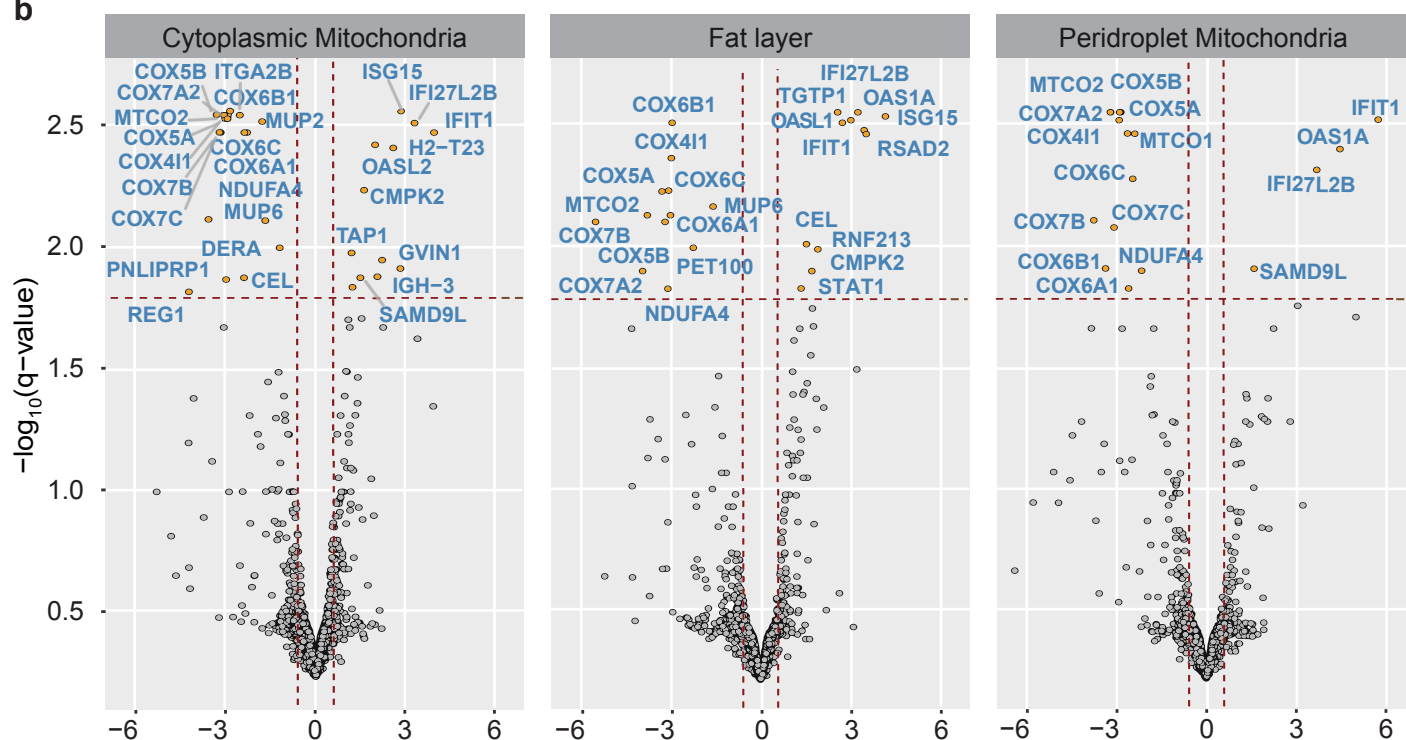**c**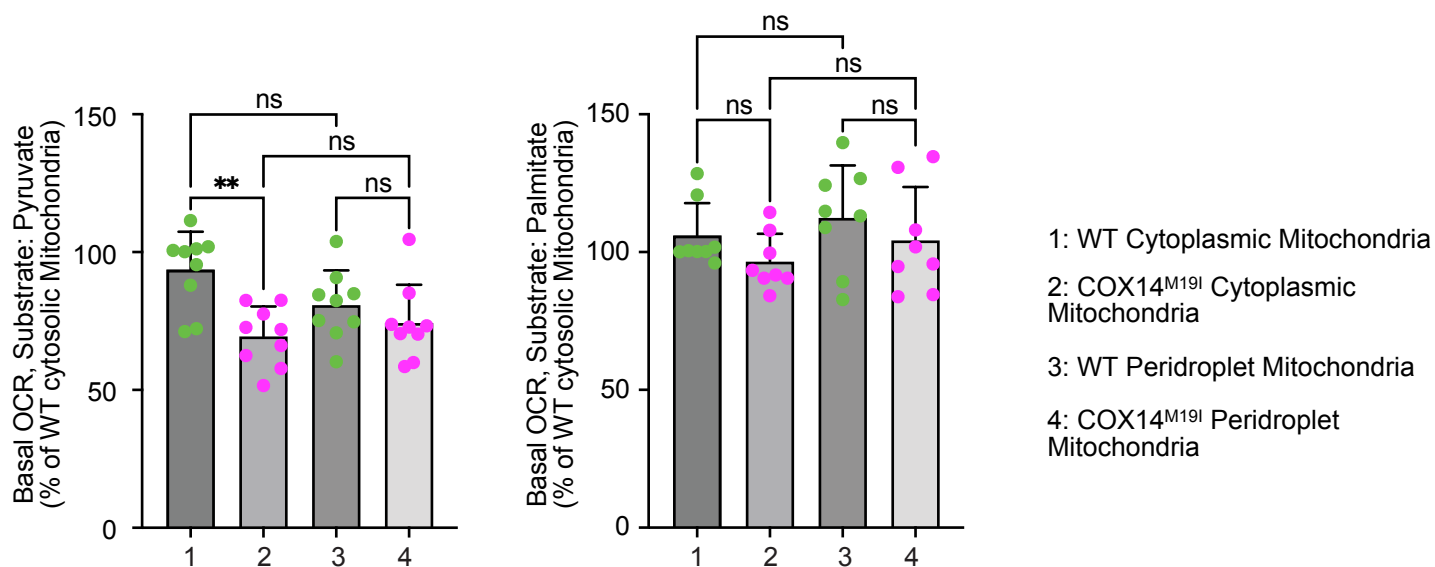**Supplementary Figure 5**

### **Supplementary Figure 5. Analysis of peridroplet mitochondria**

**a** Cartoon depicting the fractionation of mice liver for separation and isolation of different intracellular fractions. The fat layer was washed and subjected to high-speed centrifugation to separate the lipid body associated mitochondria, termed as peridroplet mitochondria, from the fat layer. **b** Volcano plots for mass spectrometric analysis of proteomes from the different intracellular fractions, obtained from WT and COX14<sup>M19I</sup> mice livers, n=3. **c** Real-time respirometry, using succinate and palmitate as substrates, of cytoplasmic and peridroplet mitochondria obtained from WT and COX14<sup>M19I</sup> mice livers; oxygen consumption rates, OCR. Means  $\pm$  SEMs; n=9; One-way ANOVA; ns=non-significant, Pyruvate respiration  $p = 0.0019$ . Source data are provided as a Source Data file.

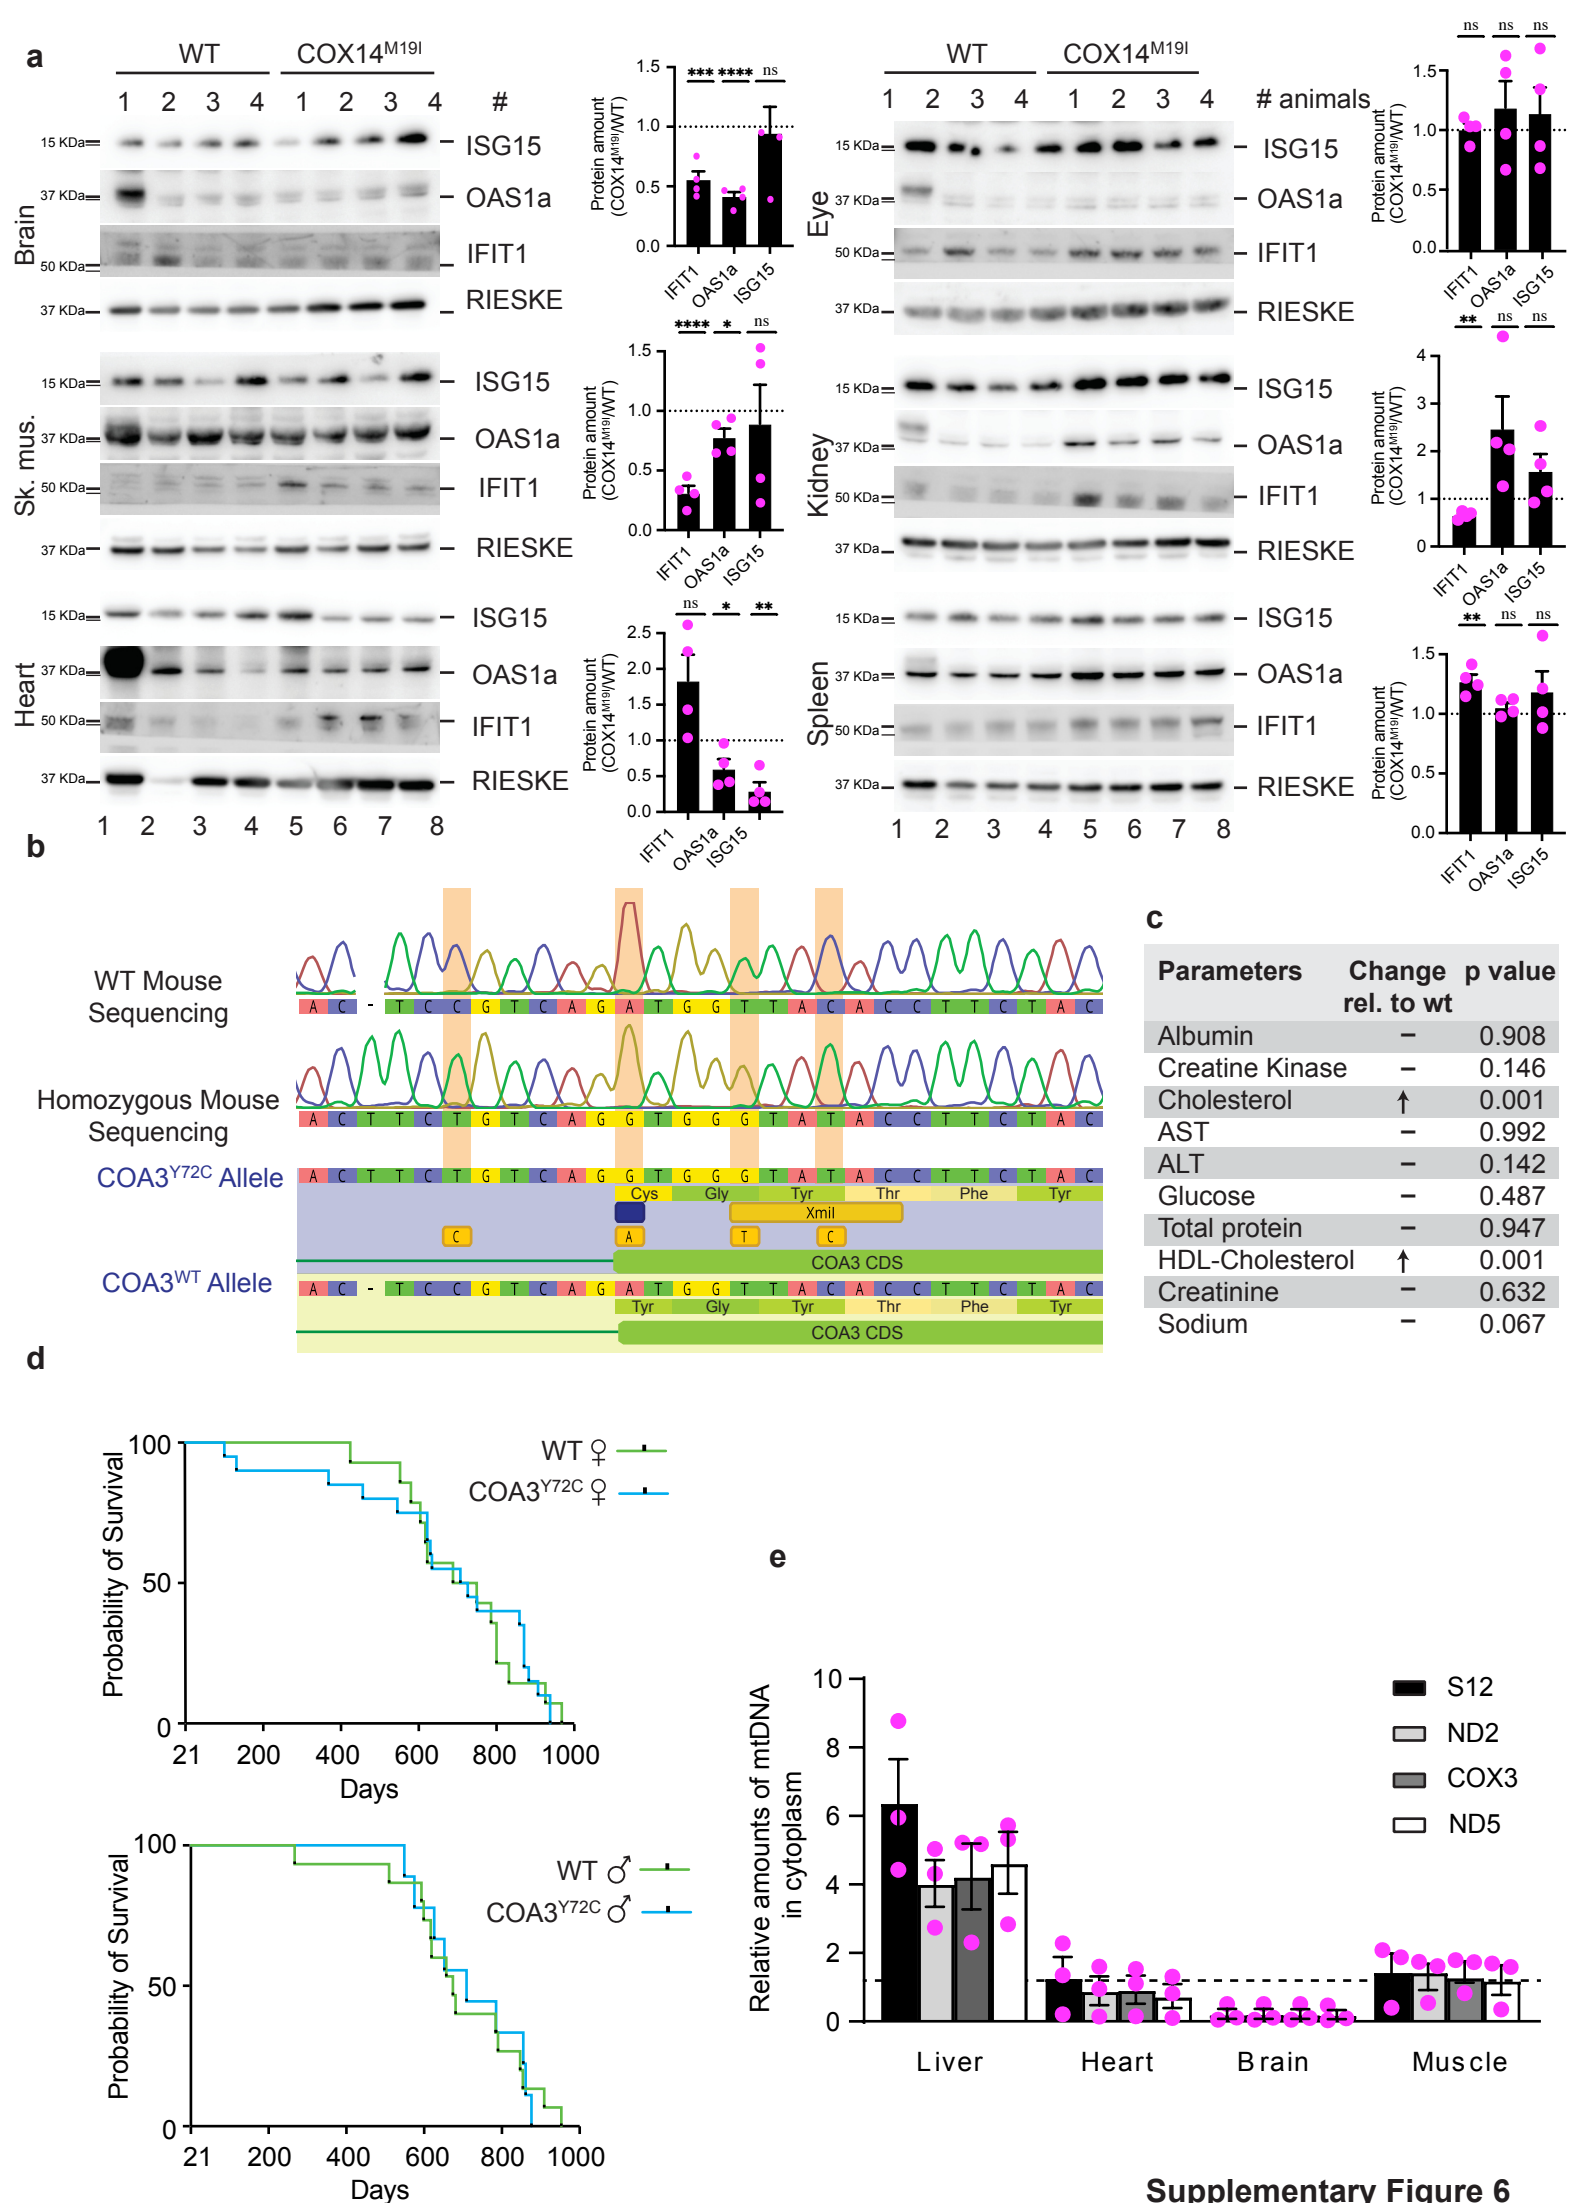

Supplementary Figure 6

## **Supplementary Figure 6. Inflammatory pathway activation in COX14<sup>M19I</sup> mouse tissues and characterization of COA3<sup>Y72C</sup> mice**

**a** Western blot analysis and quantification of indicated tissue lysates from 24-week-old WT and COX14<sup>M19I</sup> mice using indicated antibodies. Means  $\pm$  SEMs; n=4; Unpaired t test; ns=non-significant, Brain: IFIT1 p = 0.0009; OAS1a p > 0.0001; Muscle: IFIT1 p > 0.0001; OAS1a p = 0.0246; Heart: OAS1a p = 0.0258; ISG15 p = 0.0011; Kidney: IFIT1 p = 0.0002; Spleen: IFIT1 p = 0.0028. **b** Multiple sequence alignment of sanger sequencing reads for the *Coa3* allele from wild-type (WT) and homozygous COA3<sup>Y72C</sup> mice. **c** Serum biochemical parameters for COA3<sup>Y72C</sup> mice. Arrows indicate increase compared to WT with p values. **d** Survival curve for WT and COA3<sup>Y72C</sup> female and male mice. **e** Measurement of relative DNA abundance in the cytosolic fractions from WT and COX14<sup>M19I</sup> mice livers fractionation samples. Means  $\pm$  SEM, n = 4. Source data are provided as a Source Data file.



a

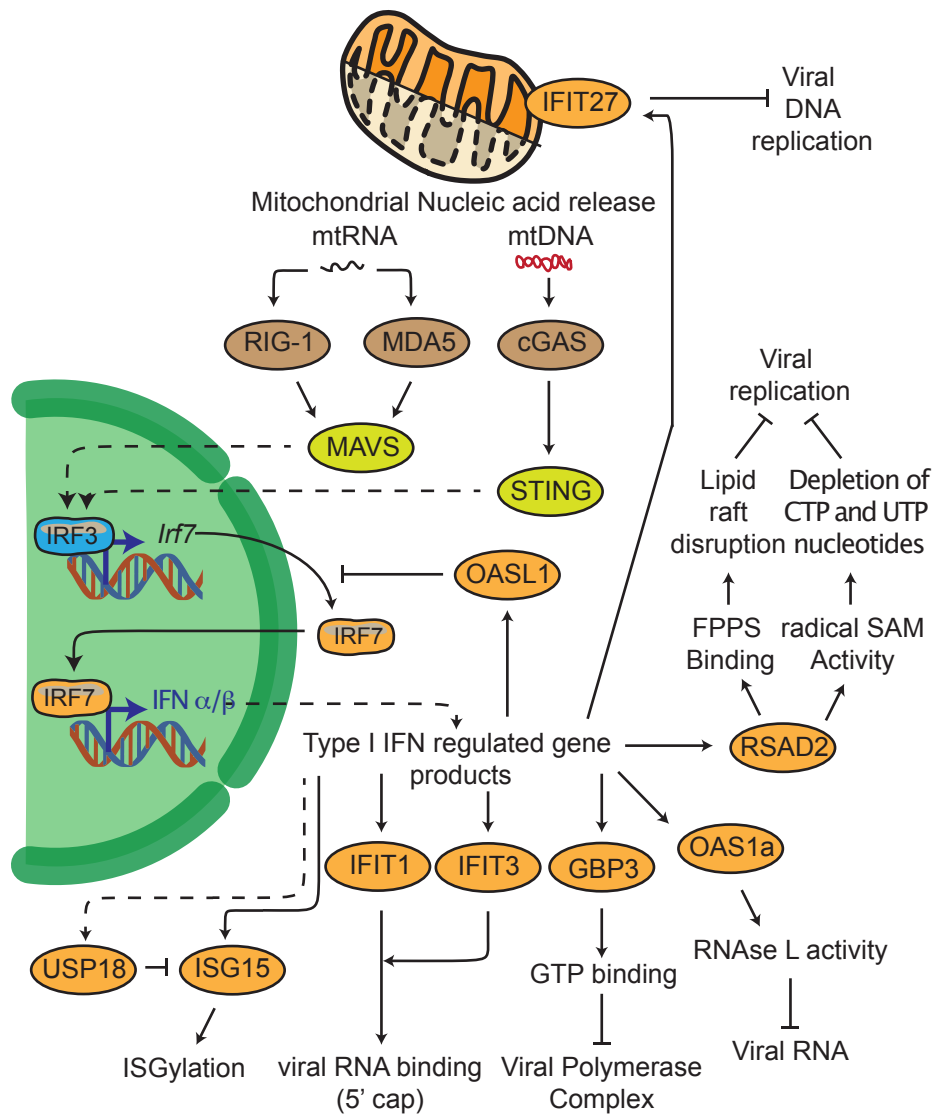

b

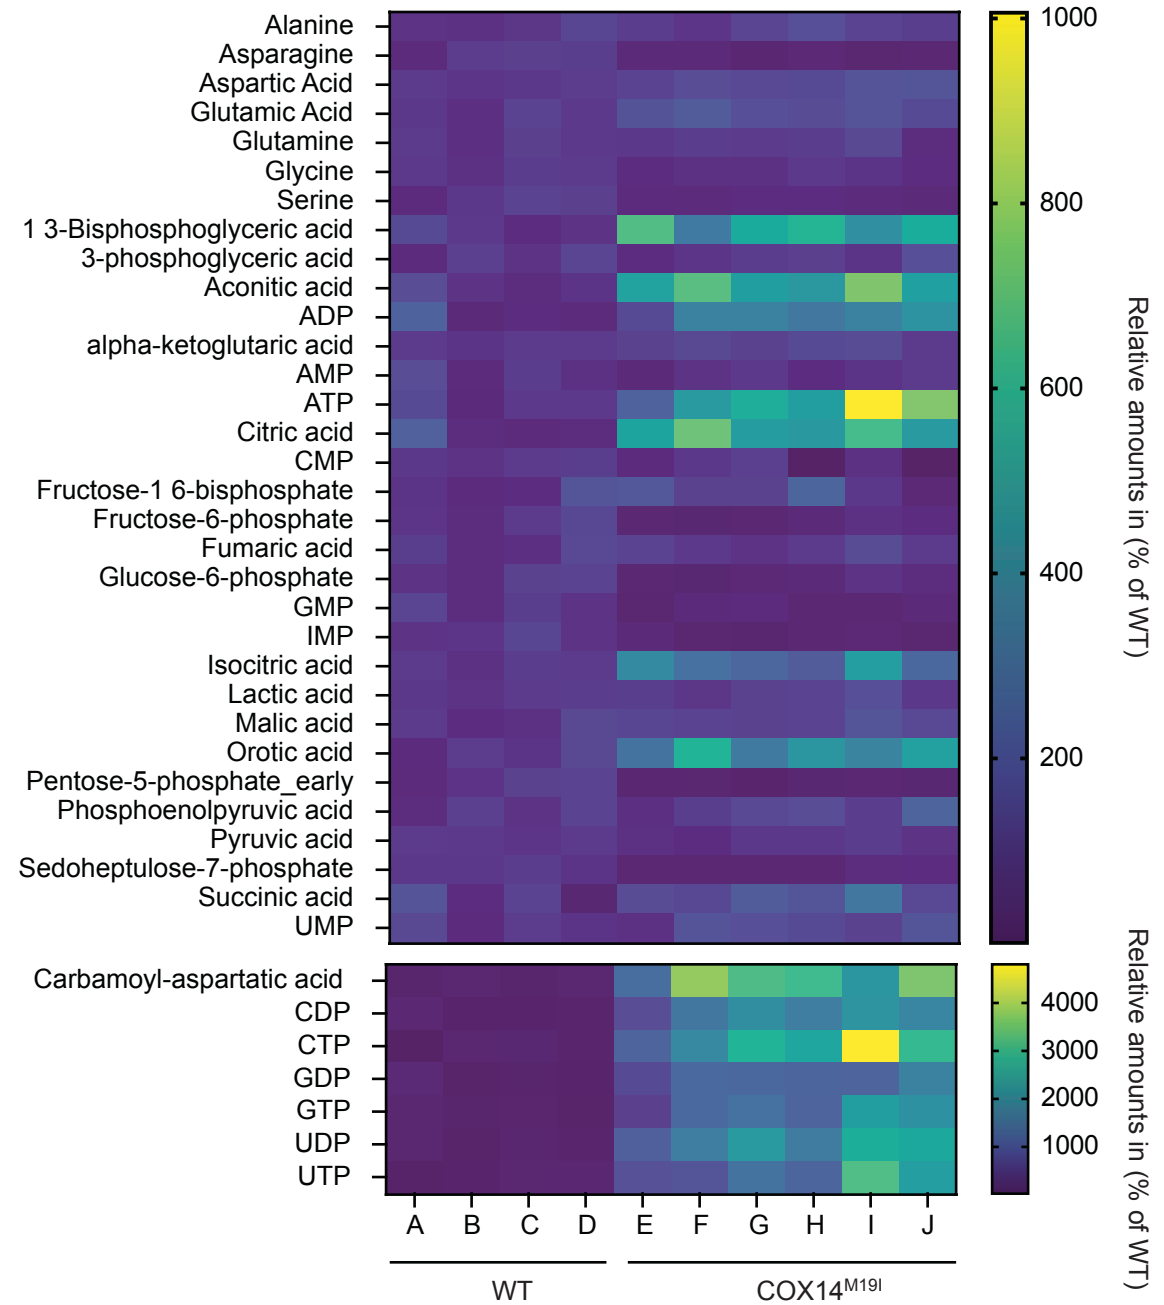

Supplementary Figure 7

**Supplementary Figure 7. Signalling pathways activation in COX14<sup>M19I</sup>**

**a** Schematic presentation of pathways for mitochondrial nucleic acid sensing and subsequent activation of type I IFN pathway leading to expression of different Interferon Stimulated Genes (ISGs). **b** Heatmap depicting relative levels of different classes of metabolites determined by mass spectrometry in wild-type (WT) and COX14<sup>M19I</sup> mice liver samples. n=4 (WT); n=6 (COX14<sup>M19I</sup>).

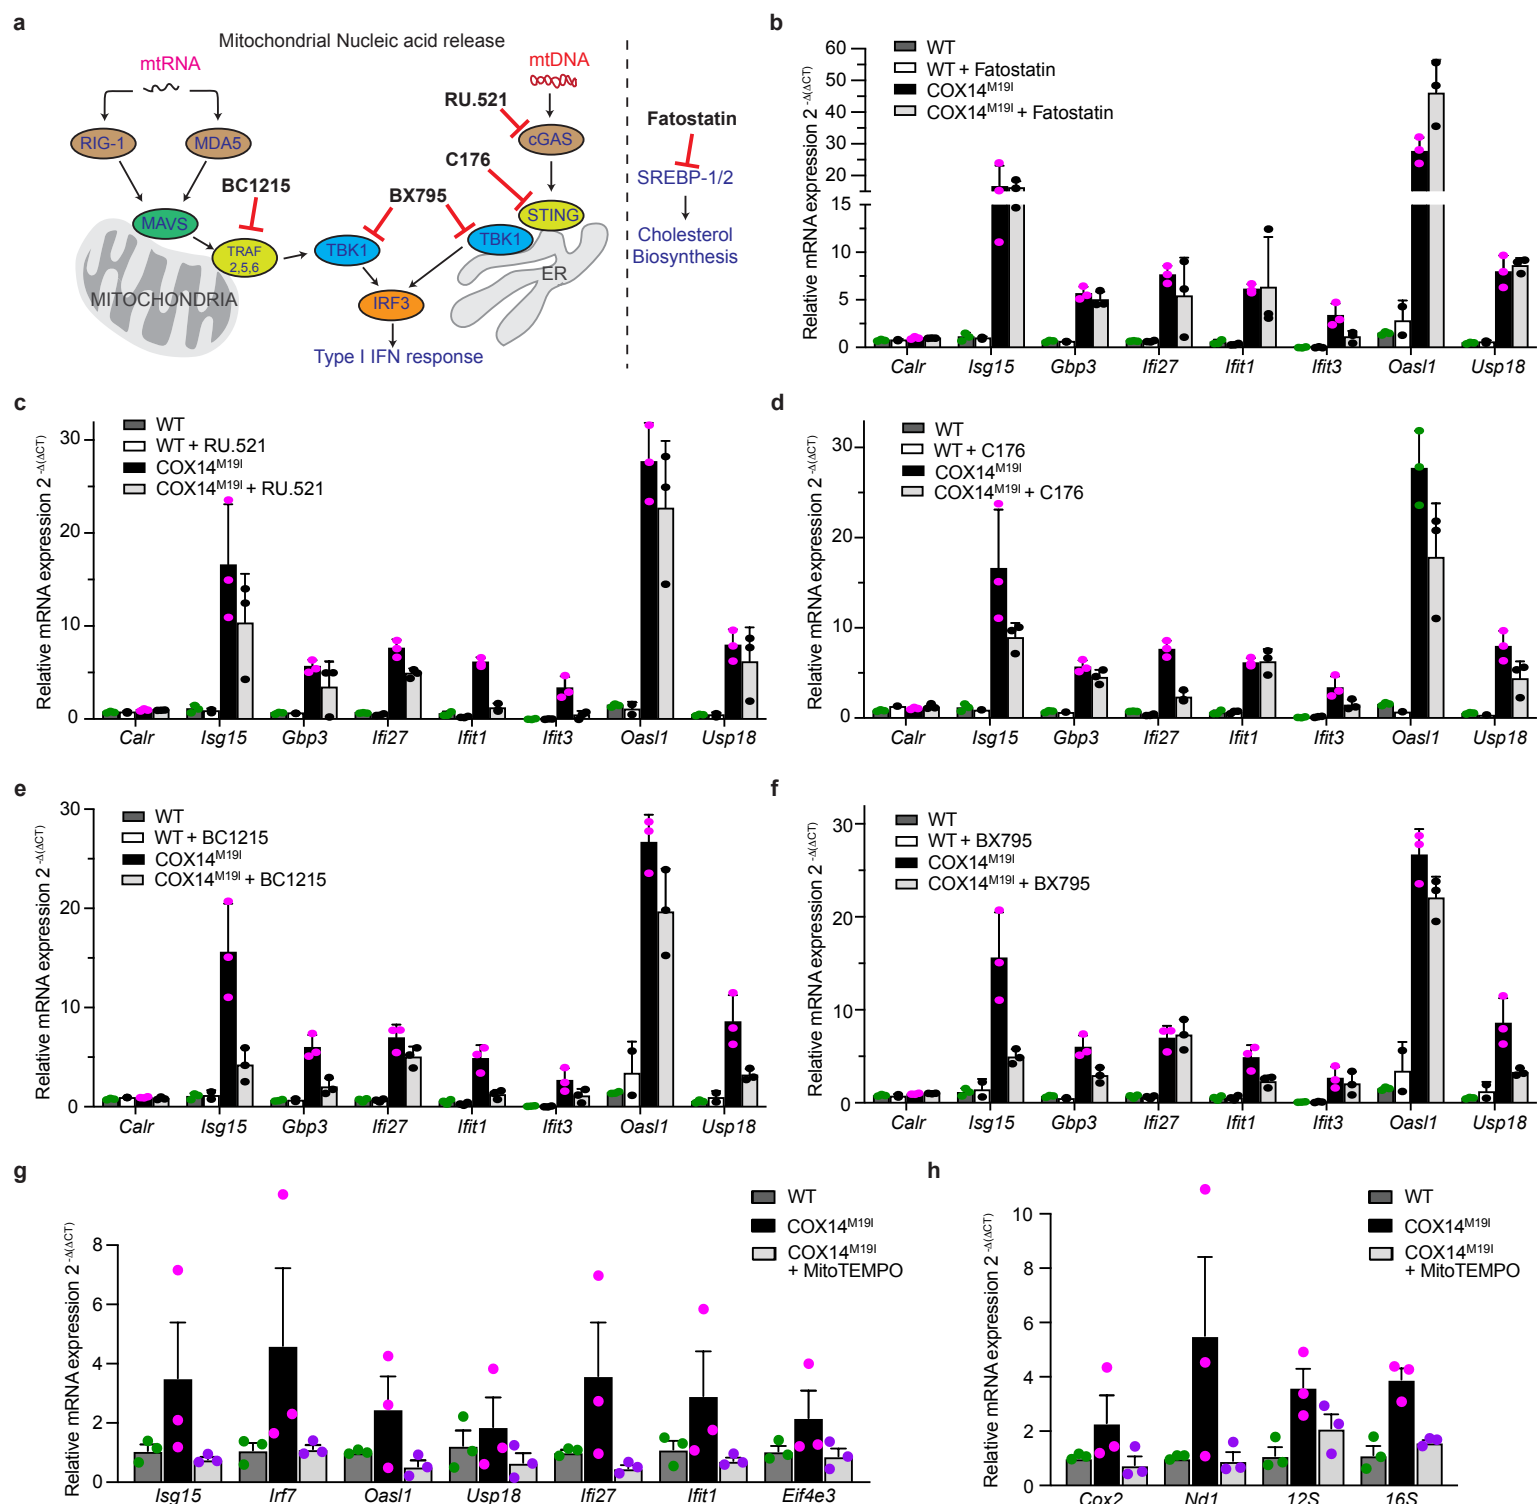

Supplementary Figure 8

## **Supplementary Figure 8. Pharmacological analysis of signalling processes in COX14<sup>M19I</sup>**

**a** Schematic presentation depicting targets for inhibitors of cytosolic nucleic acid sensing pathways. **b** qPCR analysis of gene expression of nucleic acid sensing pathway target genes in total mRNA isolated from WT and COX14<sup>M19I</sup> primary hepatocytes treated with either vehicle control or Fatostatin for 24h. Means  $\pm$  SEM, n = 3. **c** qPCR analysis of gene expression of nucleic acid sensing pathway target genes in total mRNA isolated from WT and COX14<sup>M19I</sup> primary hepatocytes treated with either vehicle control or RU.521 for 24h. Means  $\pm$  SEM, n = 3. **d** qPCR analysis as in (C) using primary hepatocytes treated with either vehicle control or C176 for 24h. Means  $\pm$  SEM, n = 3. **e** qPCR analysis as in (C) using primary hepatocytes treated with either vehicle control or BC1215 for 24h. Means  $\pm$  SEM, n = 3. **f** qPCR analysis as in (C) using primary hepatocytes treated with either vehicle control or BX795 for 24h. Means  $\pm$  SEM, n = 3. **g** qPCR analysis of gene expression of nucleic acid sensing pathway target genes in total mRNA isolated from WT and COX14<sup>M19I</sup> primary hepatocytes treated with either vehicle control or MitoTEMPO for 24h. Means  $\pm$  SEM, n = 3. **h** Measurement of relative mRNA abundance in the cytosolic fractions from WT and COX14<sup>M19I</sup> hepatocyte fractionation samples. Means  $\pm$  SEM, n = 3. Source data are provided as a Source Data file.
