# Supplementary material for: Defective mitochondrial COX1 translation due to loss of COX14 function triggers ROS-induced inflammation in mouse liver
Source: Springer Nature journal article supplement (doi:10.1038/s41467-024-51109-y), 2024-08-12
Supplement: MOESM3 [file 41467_2024_51109_MOESM3_ESM.pdf › 41467_2024_51109_MOESM3_ESM.pdf]

## **Description of Additional Supplementary files**

**Supplementary Data 1:** Serum biochemical parameters for 16-week-old COX14<sup>M19I</sup> mice.

**Supplementary Data 2:** Lipid species in wild-type (WT) and COX14M19I mice liver samples analyzed by mass spectrometry.
