# Supplementary material for: Defective mitochondrial COX1 translation due to loss of COX14 function triggers ROS-induced inflammation in mouse liver
Source: Nat Commun. 2024 Aug 12;15:6914. doi: 10.1038/s41467-024-51109-y (PMC11319346; doi:10.1038/s41467-024-51109-y)
Supplement: Supplementary file 4 — Supplementary Data 1 [file 41467_2024_51109_MOESM4_ESM.xlsx]

## Sheet: Table legend
	Defective mitochondrial COX1 translation due to loss of COX14 function triggers ROS-induced inflammation in mouse liver
	Supplementary Data 1: Serum biochemical parameters for 16-week-old COX14M19I mice

## Sheet: Raw Values
No	wt/KO	SPECIMEN_ID	Line/Strain	Sex		1.Alb	3.ALP	4.Bili-T	7.Ca	8.CKnac	11.Chol	12.Fe	14.AST	15.ALT	17.Gluc	18.TP	20.Urea	21.HBDH	22.HDL	28.LDH	31.Phosp	36.TG	43.CREZ	96.LIH	97.Na	98.K	99.Cl
1	wt	82Z-01646	C57Bl/6NCrl	f		27.08	156	1.82	2.22	77	1.58	18.73	47	26	9.91	46.815	6.88	35	0.971	132.52	1.3	0.828	8.416	0 0 0	150	4.63	116.7
2	wt	82Z-01647	C57Bl/6NCrl	f		25.32	110	3.32	2.23	39	1.34	27.1	50	17	11.91	47.459	5.88	31.1	0.733	112.18	1.41	0.612	7.86	0 0 0	146	5.48	113.1
3	wt	82Z-01648	C57Bl/6NCrl	f		28.27	132	1.99	2.15	60	2.12	24.06	36	18	11.62	49.66	8.39	29.8	1.333	125.43	1.5	0.632	7.963	0 0 0	146	5.07	110.8
	wt	82Z-03344	C57Bl/6NCrl	f		26.61	143	1.67	2.19	43	2.01	16.77	41	20	13.22	50.986	9.01	31.8	1.316	122.41	1.47	0.551	7.133	0 0 0	149	4.6	117	c140
	wt	82Z-03345	C57Bl/6NCrl	f		26.96	157	1.77	2.28	60	2.21	21.82	38	17	14.41	49.585	11.61	32.4	1.432	127.31	1.97	0.742	8.101	0 0 0	151	3.91	112.8	c140
	wt	82Z-03346	C57Bl/6NCrl	f		25.21	149	2.17	2.29	48	1.85	23.3	40	22	12.75	48.124	7.51	35.3	1.127	148.63	1.04	0.782	7.792	0 0 0	147	4.67	113.5	c140
	wt	82Z-03353	C57Bl/6NCrl	f		27.08	143	4.55	2.32	108	2.13	17.42	48	24	15.88	50.781	9.44	42.9	1.333	170.93	1.38	0.713	7.442	0 0 0	150	4.16	115	c140
	wt	82Z-03354	C57Bl/6NCrl	f		27.48	124	2.16	2.31	76	2.04	24.25	40	23	15.57	52.033	8.73	55.2	1.491	223.63	1.42	0.852	7.711	0 0 0	147	4.07	111.9	c140
9	mut	E64-F3325	COX1 4M1 9I	f		25.09	153	2.05	2.23	86	2.45	17.93	55	26	11.88	46.256	7.38	35.7	1.524	125.97	1.96	0.616	10.721	0 0 0	147	4.69	109.4
10	mut	E64-F3334	COX1 4M1 9I	f		25.47	170	2.25	2.34	234	2.41	27.58	76	32	10.66	46.971	7.35	55.1	1.557	197.85	1.65	0.602	11.897	0 0 0	147	4.92	111.4
11	mut	E64-F3344	COX1 4M1 9I	f		25.06	118	2.24	2.19	49	2.43	46.04	47	31	8.82	44.023	10.35	38.2	1.34	131.04	0.72	1.085	7.905	0 0 0	152	4.33	116.1
12	mut	E64-F3346	COX1 4M1 9I	f		25.52	140	2.82	2.35	124	2.5	52.33	53	27	8.01	47.437	11.17	41.4	1.494	135.32	0.81	0.957	8.501	0 0 0	153	4.21	116.7
13	mut	E64-F3359	COX1 4M1 9I	f		24.96	144	2.49	2.3	105	2.91	29.52	54	25	10.91	45.932	8.44	43.8	1.565	155.36	1.2	0.619	10.228	0 0 0	153	4.86	116.2
14	mut	E64-F3361	COX1 4M1 9I	f		26.46	125	2.2	2.44	77	3.11	26.62	50	25	12.1	48.589	8.66	38.4	1.791	130.84	1.55	0.758	9.322	0 0 0	153	4.64	117.1
15	mut	E64-F3368	COX1 4M1 9I	f		24.99	162	1.92	2.19	56	2	19.07	97	36	8.58	45.272	16.74	61.5	1.243	208.29	1.31	1.277	8.605	0 0 0	153	4.93	112.4
16	mut	E64-F3370	COX1 4M1 9I	f		25.39	141	2.08	2.44	214	3.3	22.03	54	29	13.64	46.851	7.18	46.5	1.917	175.45	2.1	0.761	10.681	0 0 0	153	4.72	117.7
17	wt	82Z-01644	C57Bl/6NCrl	m		25.46	115	1.53	2.35	88	2.74	23.29	35	20	13.61	51.052	11.16	40.2	1.87	158.95	0.85	1.072	8.295	0 0 0	144	6.65	107.6
25	mut	E64-F3324	COX1 4M1 9I	m		26.02	94	2.59	2.18	293	2.53	25.36	179	124	5.11	47.726	11.16	78.9	1.424	253.44	0.95	0.987	6.735	9 9 9	151	6.17	114
26	mut	E64-F3358	COX1 4M1 9I	m		25.68	106	1.31	2.28	58	3.22	17	54	26	10.44	48.592	10.35	35.3	2.245	140.69	1.54	1.263	7.389	0 0 0	146	6.09	109
27	mut	E64-F3364	COX1 4M1 9I	m		26.11	102	2.4	2.24	98	3.33	20.88	54	36	12.82	50.662	8.4	41.8	2.266	159	1.62	0.618	8.106	0 0 0	148	5.35	110.3
28	mut	E64-F3367	COX1 4M1 9I	m		25.71	94	2.3	2.34	77	2.74	24.77	46	26	14.01	48.709	8.87	42.4	1.967	169.59	1.67	0.654	8.869	0 0 0	150	6.49	109.6

## Sheet: Final results
		WT								COX14M19I
SPECIMEN_ID
	Female	82Z-01646	82Z-01647	82Z-01648	82Z-03344	82Z-03345	82Z-03346	82Z-03353	82Z-03354	E64-F3325	E64-F3334	E64-F3344	E64-F3346	E64-F3359	E64-F3361	E64-F3368	E64-F3370
1.Alb		WT								COX14M19I									M wt vs mut	F wt vs mut	wt vs mut	M vs F		Albumin		WT		COX14M19I
	Female	27.08	25.32	28.27	26.61	26.96	25.21	27.08	27.48	25.09	25.47	25.06	25.52	24.96	26.46	24.99	25.39			0.00427144					Female	26.7513	1.03794	25.3675	0.493956		0.00427144
3.ALP		WT								COX14M19I									M wt vs mut	F wt vs mut	wt vs mut	M vs F		ALP		WT		COX14M19I
	Female	156	110	132	143	157	149	143	124	153	170	118	140	144	125	162	141			0.573334					Female	139.25	16.2986	144.125	17.4964		0.573334
4.Bili-T		WT								COX14M19I									M wt vs mut	F wt vs mut	wt vs mut	M vs F		Total Bilirubin		WT		COX14M19I
	Female	1.82	3.32	1.99	1.67	1.77	2.17	4.55	2.16	2.05	2.25	2.24	2.82	2.49	2.2	1.92	2.08			0.641401					Female	2.43125	1.00042	2.25625	0.283495		0.641401
7.Ca		WT								COX14M19I									M wt vs mut	F wt vs mut	wt vs mut	M vs F		Ca		WT		COX14M19I
	Female	2.22	2.23	2.15	2.19	2.28	2.29	2.32	2.31	2.23	2.34	2.19	2.35	2.3	2.44	2.19	2.44			0.164211					Female	2.24875	0.0608129	2.31	0.101136		0.164211
8.CKnac		WT								COX14M19I									M wt vs mut	F wt vs mut	wt vs mut	M vs F		Creatine Kinase		WT		COX14M19I
	Female	77	39	60	43	60	48	108	76	86	234	49	124	105	77	56	214			0.0555142					Female	63.875	22.6869	118.125	69.8845		0.0555142
11.Chol		WT								COX14M19I									M wt vs mut	F wt vs mut	wt vs mut	M vs F		Cholesterol		WT		COX14M19I
	Female	1.58	1.34	2.12	2.01	2.21	1.85	2.13	2.04	2.45	2.41	2.43	2.5	2.91	3.11	2	3.3			0.00154941					Female	1.91	0.303974	2.63875	0.429566		0.00154941
12.Fe		WT								COX14M19I									M wt vs mut	F wt vs mut	wt vs mut	M vs F		Fe		WT		COX14M19I
	Female	18.73	27.1	24.06	16.77	21.82	23.3	17.42	24.25	17.93	27.58	46.04	52.33	29.52	26.62	19.07	22.03			0.0887071					Female	21.6812	3.68875	30.14	12.5467		0.0887071
14.AST		WT								COX14M19I									M wt vs mut	F wt vs mut	wt vs mut	M vs F		AST		WT		COX14M19I
	Female	47	50	36	41	38	40	48	40	55	76	47	53	54	50	97	54			0.011668					Female	42.5	5.12696	60.75	17.0524		0.011668
15.ALT		WT								COX14M19I									M wt vs mut	F wt vs mut	wt vs mut	M vs F		ALT		WT		COX14M19I
	Female	26	17	18	20	17	22	24	23	26	32	31	27	25	25	36	29			0.000641879					Female	20.875	3.39905	28.875	3.90741		0.000641879
17.Gluc		WT								COX14M19I									M wt vs mut	F wt vs mut	wt vs mut	M vs F		Glucose		WT		COX14M19I
	Female	9.91	11.91	11.62	13.22	14.41	12.75	15.88	15.57	11.88	10.66	8.82	8.01	10.91	12.1	8.58	13.64			0.022255					Female	13.1587	2.05069	10.575	1.97055		0.022255
18.TP		WT								COX14M19I									M wt vs mut	F wt vs mut	wt vs mut	M vs F		Total Protein		WT		COX14M19I
	Female	46.815	47.459	49.66	50.986	49.585	48.124	50.781	52.033	46.256	46.971	44.023	47.437	45.932	48.589	45.272	46.851			0.0023597					Female	49.4304	1.83333	46.4164	1.39164		0.0023597
20.Urea		WT								COX14M19I									M wt vs mut	F wt vs mut	wt vs mut	M vs F		Urea		WT		COX14M19I
	Female	6.88	5.88	8.39	9.01	11.61	7.51	9.44	8.73	7.38	7.35	10.35	11.17	8.44	8.66	16.74	7.18			0.35791					Female	8.43125	1.74487	9.65875	3.20838		0.35791
21.HBDH		WT								COX14M19I									M wt vs mut	F wt vs mut	wt vs mut	M vs F		HBDH		WT		COX14M19I
	Female	35	31.1	29.8	31.8	32.4	35.3	42.9	55.2	35.7	55.1	38.2	41.4	43.8	38.4	61.5	46.5			0.076136					Female	36.6875	8.51057	45.075	9.00123		0.076136
22.HDL		WT								COX14M19I									M wt vs mut	F wt vs mut	wt vs mut	M vs F		HDL Cholesterol		WT		COX14M19I
	Female	0.971	0.733	1.333	1.316	1.432	1.127	1.333	1.491	1.524	1.557	1.34	1.494	1.565	1.791	1.243	1.917			0.0134825					Female	1.217	0.256595	1.55388	0.21879		0.0134825
28.LDH		WT								COX14M19I									M wt vs mut	F wt vs mut	wt vs mut	M vs F		LDH		WT		COX14M19I
	Female	132.52	112.18	125.43	122.41	127.31	148.63	170.93	223.63	125.97	197.85	131.04	135.32	155.36	130.84	208.29	175.45			0.494236					Female	145.38	36.4617	157.515	32.5829		0.494236
31.Phosp		WT								COX14M19I									M wt vs mut	F wt vs mut	wt vs mut	M vs F		Phosphate		WT		COX14M19I
	Female	1.3	1.41	1.5	1.47	1.97	1.04	1.38	1.42	1.96	1.65	0.72	0.81	1.2	1.55	1.31	2.1			0.906656					Female	1.43625	0.259061	1.4125	0.499421		0.906656
36.TG		WT								COX14M19I									M wt vs mut	F wt vs mut	wt vs mut	M vs F		Triglyceride		WT		COX14M19I
	Female	0.828	0.612	0.632	0.551	0.742	0.782	0.713	0.852	0.616	0.602	1.085	0.957	0.619	0.758	1.277	0.761			0.229597					Female	0.714	0.107667	0.834375	0.248727		0.229597
43.CREZ		WT								COX14M19I									M wt vs mut	F wt vs mut	wt vs mut	M vs F		Creatinine		WT		COX14M19I
	Female	8.416	7.86	7.963	7.133	8.101	7.792	7.442	7.711	10.721	11.897	7.905	8.501	10.228	9.322	8.605	10.681			0.00181959					Female	7.80225	0.393015	9.7325	1.36818		0.00181959
96.LIH		WT								COX14M19I									M wt vs mut	F wt vs mut	wt vs mut	M vs F		LIH		WT		COX14M19I
	Female	0 0 0	0 0 0	0 0 0	0 0 0	0 0 0	0 0 0	0 0 0	0 0 0	0 0 0	0 0 0	0 0 0	0 0 0	0 0 0	0 0 0	0 0 0	0 0 0			#DIV/0!					Female	#DIV/0!	#DIV/0!	#DIV/0!	#DIV/0!		#DIV/0!
97.Na		WT								COX14M19I									M wt vs mut	F wt vs mut	wt vs mut	M vs F		Na		WT		COX14M19I
	Female	150	146	146	149	151	147	150	147	147	147	152	153	153	153	153	153			0.0199867					Female	148.25	1.98206	151.375	2.72226		0.0199867
98.K		WT								COX14M19I									M wt vs mut	F wt vs mut	wt vs mut	M vs F		K		WT		COX14M19I
	Female	4.63	5.48	5.07	4.6	3.91	4.67	4.16	4.07	4.69	4.92	4.33	4.21	4.86	4.64	4.93	4.72			0.677354					Female	4.57375	0.527282	4.6625	0.266391		0.677354
99.Cl		WT								COX14M19I									M wt vs mut	F wt vs mut	wt vs mut	M vs F		Cl		WT		COX14M19I
	Female	116.7	113.1	110.8	117	112.8	113.5	115	111.9	109.4	111.4	116.1	116.7	116.2	117.1	112.4	117.7			0.573901					Female	113.85	2.2123	114.625	3.09827		0.573901
