# Supplementary material for: Defective mitochondrial COX1 translation due to loss of COX14 function triggers ROS-induced inflammation in mouse liver
Source: Nat Commun. 2024 Aug 12;15:6914. doi: 10.1038/s41467-024-51109-y (PMC11319346; doi:10.1038/s41467-024-51109-y)
Supplement: Supplementary file 5 — Supplementary Data 2 [file 41467_2024_51109_MOESM5_ESM.xlsx]

## Sheet: Table legend 
	Defective mitochondrial COX1 translation due to loss of COX14 function triggers ROS-induced inflammation in mouse liver
	Supplementary Data 2: Lipid species in wild-type (WT) and COX14M19I mice liver samples analyzed by mass spectrometry

## Sheet: sample information
Lipidomics sample receipt
Name	Abhishek Aich
e-mail	abhishek.aich@med.uni-goettingen.de
Principal investigator	Prof. Peter Rehling
Project title	Lipid profiling of primary hepatocytes isolated from Cox14 KO mice vs WT control.
Run	8
Aim (short description, lipids of interest etc.)
Entry date (YYMMDD)	2022-07-20
continuous from 1 to n	unique to each sample,	A to Z	a to z				type
write those on your tubes	same name for replicates
sample number	sample name	biol. repl.	tech. repl.	treatment	organism	tissue	buffer	protein concentration [µM]	sample volume [µl]	cell count	tissue mass [mg]	additional information
1	T1473	yes			Mouse	Liver					80.7	WT liver piece flash frozen in liquid nitrogen
2	T1480	yes			Mouse	Liver					89.9	WT liver piece flash frozen in liquid nitrogen
3	T1487	yes			Mouse	Liver					87.3	WT liver piece flash frozen in liquid nitrogen
4	T1494	yes			Mouse	Liver					68.1	WT liver piece flash frozen in liquid nitrogen
5	T1501	yes			Mouse	Liver					46.4	WT liver piece flash frozen in liquid nitrogen
6	T1508	yes			Mouse	Liver					69.7	WT liver piece flash frozen in liquid nitrogen
7	T1515	yes			Mouse	Liver					47.8	WT liver piece flash frozen in liquid nitrogen
8	T1522	yes			Mouse	Liver					60.9	WT liver piece flash frozen in liquid nitrogen
9	T1529	yes			Mouse	Liver					83	COX14 liver piece flash frozen in liquid nitrogen
10	T1536	yes			Mouse	Liver					64.6	COX14 liver piece flash frozen in liquid nitrogen
11	T1543	yes			Mouse	Liver					87.9	COX14 liver piece flash frozen in liquid nitrogen
12	T1550	yes			Mouse	Liver					80.8	COX14 liver piece flash frozen in liquid nitrogen
13	T1557	yes			Mouse	Liver					47.1	COX14 liver piece flash frozen in liquid nitrogen
14	T1564	yes			Mouse	Liver					66.9	COX14 liver piece flash frozen in liquid nitrogen
15	T1571	yes			Mouse	Liver					73.9	COX14 liver piece flash frozen in liquid nitrogen
16	T1578	yes			Mouse	Liver					91.3	COX14 liver piece flash frozen in liquid nitrogen

## Sheet: Sciex Qtrap6500 settings
Lipidclass	Scan Type	Polarity	Scan Mode	Ion Source	# Scans to Sum	Precursor Of	Resolution Q1	Resolution Q3	Scan Rate	Intensity Thres.	Settling Time	MR Pause	MCA	Center/Width	Step Size	Start (Da)	Stop (Da)	CUR:	IS:	GS1:	GS2:	IHT:	CAD:	DP	EP	CE	CXP
PC	Precursor Ion (Prec)	Positive	Profile	Nanospray	1	184.00 Da	High	Unit	200 Da/s	0.00 cps	0.0000 msec	5.0070 msec	Yes	No	0.10 Da	644	880	20	0	0	0	60	Medium	100	12	32	13
SM	Precursor Ion (Prec)	Positive	Profile	Nanospray	1	184.00 Da	High	Unit	200 Da/s	0.00 cps	0.0000 msec	5.0070 msec	Yes	No	0.10 Da	644	880	20	0	0	0	60	Medium	100	12	32	13
PE	Neutral Loss (NL)	Positive	Profile	Nanospray	1	141.00 Da	Unit	Unit	200 Da/s	0.00 cps	0.0000 msec	5.0070 msec	Yes	No	0.10 Da	620	860	20	0	0	0	60	Medium	100	7	20	19
PS	Neutral Loss (NL)	Positive	Profile	Nanospray	1	185.00 Da	Unit	Unit	200 Da/s	0.00 cps	0.0000 msec	5.0070 msec	Yes	No	0.10 Da	670	910	20	0	0	0	60	Medium	100	7	20	19
PG	Neutral Loss (NL)	Positive	Profile	Nanospray	1	189.00 Da	Unit	Unit	200 Da/s	0.00 cps	0.0000 msec	5.0070 msec	Yes	No	0.10 Da	670	910	20	0	0	0	60	Medium	100	7	20	19
PI	Neutral Loss (NL)	Positive	Profile	Nanospray	1	277.00 Da	Unit	Unit	200 Da/s	0.00 cps	0.0000 msec	5.0070 msec	Yes	No	0.10 Da	800	950	20	0	0	0	60	Medium	100	11	30	25
PA	Neutral Loss (NL)	Positive	Profile	Nanospray	1	115.00 Da	Unit	Unit	200 Da/s	0.00 cps	0.0000 msec	5.0070 msec	Yes	No	0.10 Da	600	900	20	0	0	0	60	Medium	100	10	25	14
Cer	Precursor Ion (Prec)	Positive	Profile	Nanospray	1	264.40 Da	High	Unit	200 Da/s	0.00 cps	0.0000 msec	5.0070 msec	Yes	No	0.10 Da	500	670	20	0	0	0	60	Medium	100	10	32	14
HexCer	Precursor Ion (Prec)	Positive	Profile	Nanospray	1	264.40 Da	High	Unit	200 Da/s	0.00 cps	0.0000 msec	5.0070 msec	Yes	No	0.10 Da	670	860	20	0	0	0	60	Medium	100	10	44	14
Cer	Precursor Ion (Prec)	Positive	Profile	Nanospray	1	369.00 Da	High	Unit	200 Da/s	0.00 cps	0.0000 msec	5.0070 msec	Yes	No	0.10 Da	500	800	20	0	0	0	60	Medium	100	10	15	14
Hex2Cer	Neutral Loss (NL)	Positive	Profile	Nanospray	1	342.40 Da	Unit	Unit	200 Da/s	0.00 cps	0.0000 msec	5.0070 msec	Yes	No	0.10 Da	830	1020	20	0	0	0	60	Medium	100	10	33	35
LPC	Precursor Ion (Prec)	Positive	Profile	Nanospray	1	184.00 Da	High	Unit	200 Da/s	0.00 cps	0.0000 msec	5.0070 msec	Yes	No	0.10 Da	450	580	20	0	0	0	60	Medium	100	7	35	10
PE-P 16p	Precursor Ion (Prec)	Positive	Profile	Nanospray	1	364.20 Da	Unit	Unit	200 Da/s	0.00 cps	0.0000 msec	5.0070 msec	Yes	No	0.10 Da	650	850	20	0	0	0	60	Medium	100	10	25	16
PE-P 18p	Precursor Ion (Prec)	Positive	Profile	Nanospray	1	390.30 Da	Unit	Unit	200 Da/s	0.00 cps	0.0000 msec	5.0070 msec	Yes	No	0.10 Da	650	850	20	0	0	0	60	Medium	100	10	27	16
PE-P 18:1p	Precursor Ion (Prec)	Positive	Profile	Nanospray	1	392.30 Da	Unit	Unit	200 Da/s	0.00 cps	0.0000 msec	5.0070 msec	Yes	No	0.10 Da	650	850	20	0	0	0	60	Medium	100	10	27	16
Cholesterol, QTRAP5500 settings
Chol	Neutral Loss (NL)	Positive	Profile	Nanospray	1	77.00 Da	Unit	Unit	200 Da/s	0.00 cps	0.0000 msec	5.0070 msec	Yes	No	0.10 Da	442	480	20	0	0	0	60	Medium	50	10	12	14

## Sheet: Sciex QTRAP5500 settings
Lipidclass	Scan Type	Polarity	Scan Mode	Ion Source	# Scans to Sum	Precursor Of	Resolution Q1	Resolution Q3	Scan Rate	Intensity Thres.	Settling Time	MR Pause	MCA	Center/Width	Step Size	Start (Da)	Stop (Da)	CUR:	IS:	GS1:	GS2:	IHT:	CAD:	DP	EP	CE	CXP
Chol	Neutral Loss (NL)	Positive	Profile	Nanospray	1	77.00 Da	Unit	Unit	200 Da/s	0.00 cps	0.0000 msec	5.0070 msec	Yes	No	0.10 Da	442	480	20	0	0	0	60	Medium	50	10	12	14

## Sheet: Thermo QExactive settings
Global Settings
Lock mass injection	Full MS, SIM
Chrom. peak width (FWHM) Time	15 s
Method duration	30 min
Full MS — SIM
General
Runtime	1 to 1.5 min
Polarity	positive
Full MS — SIM
Microscans	1
Resolution	140000
AGC target	3000000
Maximum IT	3000 ms
Scan range	350 to 1000 m/z
Targeted-SIM
General
Runtime	1.5 to 9.5 min
Polarity	positive
Inclusion	on
SIM
Microscans	1
Resolution	140000
AGC target	1000000
Maximum IT	650 ms
Isolation window	20 m/z
Scan range	150 to 2000 m/z

## Sheet: lipid nomenclature
Lipid nomenclature
Lipid classes	Notes
Glycerolipids (GL)
DAG: diacylglycerol
TAG: triacylglycerol
Glycerophospholipids (GPL)
PC: phosphatidylcholine
LPC: lyso-phosphatidylcholine
PE: phosphatidylethanolamine
PS: phosphatidylserine
PI: phosphatidylinositol
PG: phosphatidylglycerol	includes PG and lysobisphosphatidic acid (LBPA)
PA: phosphatidic acid
PE P-: ethanolamine plasmalogens
Sphingolipids (SL)
SM: sphingomyelin
Cer: ceramide
HexCer: hexosylceramide	Predominant species: Glucosylceramide
Hex2Cer: dihexosylceramide	Predominant species: Lactosylceramide
Sterols (ST)
Chol: cholesterol
CE: cholesteryl ester
GL and GPL lipid species A X:Y
A: lipid class
X: total number of C atoms of fatty acyl moieties
Y: total number of double bonds
a: diacyl
e: ether, acyl	includes diacyl species with one fatty acyl moiety with odd number of C atoms
p: 1Z alkenylether, acyl
SL lipid species B U:V;W
B: lipid class
U: total number of C atoms in long chain base and fatty acyl moiety
V: total number of double bonds in long chain base and fatty acyl moiety
W: total number of hydroxyl groupls in long chain base and fatty acyl moiety

## Sheet: meta data
class	Rf.values	X	sample.1	sample.2	sample.3	sample.4	sample.5	sample.6	sample.7	sample.8	sample.9	sample.10	sample.11	sample.12	sample.13	sample.14	sample.15	sample.16	Kon.A	Kon.B	Kon.C
sample input		[µl]	14	13	13	13	26	16	18	15	13	17	11	12	22	15	16	13	0	0	0
PC	1.1	[pmol]	50	50	50	50	50	50	50	50	50	50	50	50	50	50	50	50	50
SM	1.39	[pmol]	50	50	50	50	50	50	50	50	50	50	50	50	50	50	50	50	50
PE	1.11	[pmol]	25	25	25	25	25	25	25	25	25	25	25	25	25	25	25	25	25
plPE16_0	1.14	[pmol]	22	22	22	22	22	22	22	22	22	22	22	22	22	22	22	22
plPE18_1	1.14	[pmol]	43	43	43	43	43	43	43	43	43	43	43	43	43	43	43	43
plPE18_0	1.14	[pmol]	31	31	31	31	31	31	31	31	31	31	31	31	31	31	31	31
PS	0.78	[pmol]	25	25	25	25	25	25	25	25	25	25	25	25	25	25	25	25	25
PI	0.96	[pmol]	28	28	28	28	28	28	28	28	28	28	28	28	28	28	28	28	28
PG	0.99	[pmol]	10	10	10	10	10	10	10	10	10	10	10	10	10	10	10	10	10
PA	0.37	[pmol]	10	10	10	10	10	10	10	10	10	10	10	10	10	10	10	10	10
HexCer	1.51	[pmol]	5	5	5	5	5	5	5	5	5	5	5	5	5	5	5	5	5
Cer	1.39	[pmol]	5	5	5	5	5	5	5	5	5	5	5	5	5	5	5	5	5
Hex2Cer	1	[pmol]	5	5	5	5	5	5	5	5	5	5	5	5	5	5	5	5	5
DAG	1	[pmol]	25	25	25	25	25	25	25	25	25	25	25	25	25	25	25	25	25
TAG	1	[pmol]	24	24	24	24	24	24	24	24	24	24	24	24	24	24	24	24	24
CE	1	[pmol]	25	25	25	25	25	25	25	25	25	25	25	25	25	25	25	25	25
LPC	1	[pmol]	5	5	5	5	5	5	5	5	5	5	5	5	5	5	5	5	5
D7-Chol		[pmol]	100	100	100	100	100	100	100	100	100	100	100	100	100	100	100	100	100	100	100
Chol	1.04	[pmol]																		50	100

## Sheet: PC
C:\LipidView Data\LV Results\220804_05_XtrIL_PeterRehling_LPDS_Pos_PS_NL_QTRAP_PC_28_2_44_2_Controls_TM.txt
	sample number	sample vol [ul]	PC std input [pmol]	PC [pmol] before corr	PC [pmol] after corr	PC [uM]		aPC [uM]	ePC [uM]
WT liver	sample.1	14	50	937.056	1004.31	71.7363		69.6209	2.1154
WT liver	sample.2	13	50	1071.28	1149.27	88.4054		85.9939	2.4115
WT liver	sample.3	13	50	1046.51	1122.52	86.3479		83.3409	3.007
WT liver	sample.4	13	50	793.787	849.578	65.3522		62.8868	2.46543
WT liver	sample.5	26	50	1044.25	1120.08	43.0799		41.6802	1.39975
WT liver	sample.6	16	50	1054.78	1131.45	70.7157		68.6458	2.0699
WT liver	sample.7	18	50	944.148	1011.97	56.2205		54.5901	1.6304
WT liver	sample.8	15	50	847.561	907.655	60.5103		58.9756	1.53471
COX14 liver	sample.9	13	50	936.986	1004.23	77.2487		74.9026	2.34608
COX14 liver	sample.10	17	50	959.791	1028.86	60.5214		58.8873	1.63403
COX14 liver	sample.11	11	50	890.535	954.066	86.7333		84.3024	2.43094
COX14 liver	sample.12	12	50	852.174	912.636	76.053		74.1596	1.89341
COX14 liver	sample.13	22	50	846.083	906.058	41.1845		39.7625	1.42198
COX14 liver	sample.14	15	50	804.173	860.795	57.3864		55.7194	1.667
COX14 liver	sample.15	16	50	1073.22	1151.36	71.9603		69.9459	2.01445
COX14 liver	sample.16	13	50	1052.56	1129.06	86.8504		84.3368	2.51362
PC mol%
	O-30:2	O-30:1	O-30:0	30:2	30:1	30:0	O-32:2	O-32:1	O-32:0	32:3	32:2	32:1	32:0	O-34:3	O-34:2	O-34:1	O-34:0	34:3	34:2	34:1	34:0	O-36:6	O-36:5	O-36:4	O-36:3	O-36:2	O-36:1	O-36:0	36:6	36:5	36:4	36:3	36:2	36:1	36:0	O-38:6	O-38:5	O-38:4	O-38:3	O-38:2	O-38:1	38:7	38:6	38:5	38:4	38:3	38:2	38:1	38:0
WT liver	0.0759268	0.248014	0.0589474	0.188774	0.106007	0.10289	0.0864333	0.128615	0.114026	0.0650151	0.144422	0.784866	1.72072	0.192905	0.136318	0.190496	0.108773	1.15903	15.7551	6.68429	0.253475	0.0288695	0.0655693	0.14195	0.10422	0.277325	0.0972345	0.030197	0.00894758	1.19663	16.2011	4.93352	10.8606	1.29817	0.0827793	0.0565823	0.1162	0.32041	0.0869565	0.091176	0.0130427	0.340959	11.0239	4.24806	12.7001	1.48732	0.165375	0.0331852	0.0525006
WT liver	0.0569851	0.188893	0.0700254	0.136275	0.0985304	0.103974	0.0686368	0.108711	0.114622	0.0648802	0.151835	0.671558	1.59841	0.140287	0.124313	0.164622	0.0769509	1.09753	15.1042	6.10468	0.226493	0.0295461	0.0547004	0.127626	0.104384	0.287018	0.098005	0.0210297	0.0205179	1.08128	15.1315	5.63911	11.4042	1.26795	0.0689843	0.0571782	0.11481	0.304654	0.0950693	0.079939	0.0164059	0.358678	10.7132	4.59618	13.5072	1.89129	0.209962	0.0391791	0.0518593
WT liver	0.0718962	0.286798	0.0729381	0.164687	0.136554	0.160209	0.109905	0.147549	0.171526	0.0695151	0.191475	1.165	2.04862	0.143173	0.159863	0.288421	0.113036	1.41551	17.1765	10.4105	0.239693	0.0410236	0.0685735	0.159092	0.139832	0.327219	0.176717	0.0289811	0.0180582	1.16147	14.8378	6.58482	9.09239	1.35708	0.0746254	0.0591294	0.139426	0.292707	0.11619	0.110877	0.0371034	0.381947	9.65816	4.97524	9.11573	1.4608	0.159746	0.0435924	0.0616244
WT liver	0.0537112	0.339828	0.0816901	0.164509	0.147318	0.16441	0.104308	0.0518051	0.210813	0.0752046	0.187005	0.74348	2.3182	0.131361	0.233098	0.275043	0.112527	1.33178	20.1945	8.07959	0.33946	0.027234	0.0611895	0.202606	0.151435	0.428731	0.166393	0.0351921	0.00246954	0.809215	16.1902	6.37631	9.213	0.981704	0.0720152	0.0712393	0.139852	0.410111	0.123415	0.158002	0.00867259	0.249848	9.43176	4.61203	9.32259	1.1275	0.184815	0.0255947	0.0840854
WT liver	0.0544708	0.203363	0.0714641	0.122571	0.118898	0.155279	0.0708696	0.0958442	0.191115	0.0641973	0.178308	0.986048	2.51989	0.108734	0.173878	0.28618	0.0882584	1.30298	16.6237	10.1876	0.27756	0.027804	0.0551359	0.163768	0.138189	0.318676	0.161375	0.0222303	0.00210345	0.842695	15.6609	6.06446	9.34781	1.42286	0.0587464	0.0674689	0.156386	0.348735	0.110661	0.12082	0.0177537	0.279539	9.2257	5.31268	10.0852	1.34378	0.201985	0.0371768	0.0600379
WT liver	0.0481291	0.175033	0.0684661	0.095434	0.131182	0.145126	0.0677385	0.0818837	0.149937	0.0591492	0.229698	1.14603	1.74594	0.0818165	0.146884	0.24313	0.0663202	1.65073	16.8105	10.3255	0.205255	0.0277868	0.0428056	0.130738	0.142555	0.304136	0.140994	0.016	0.0344599	1.25741	13.624	6.8658	10.1842	1.58972	0.0567084	0.0546791	0.129956	0.270217	0.115653	0.100119	0.0281571	0.396277	9.24003	4.84407	9.5632	1.76741	0.221025	0.0365723	0.0773023
WT liver	0.0468008	0.183615	0.0623002	0.0994357	0.0951422	0.102184	0.0563312	0.0903222	0.152435	0.0523388	0.139999	0.634986	2.05704	0.0975361	0.16648	0.193466	0.0759259	1.17948	17.8249	7.52179	0.260997	0.0239241	0.0575574	0.157734	0.107464	0.302121	0.118946	0.0200443	0.0116332	0.795095	15.753	4.54886	9.49586	0.998241	0.065251	0.0730779	0.141158	0.354339	0.0856917	0.0960655	0.0135726	0.300431	12.4193	4.02156	12.2676	1.25935	0.167113	0.0234214	0.0722972
WT liver	0.04151	0.189738	0.0631785	0.0935066	0.099159	0.0964006	0.0510653	0.0577507	0.140215	0.0466013	0.149934	0.656007	1.85294	0.0855258	0.138218	0.164305	0.0729913	1.3122	19.5917	6.85428	0.269234	0.0147317	0.0484486	0.138036	0.112419	0.291455	0.099422	0.0155521	0.000465237	0.904394	15.4627	4.79068	10.9524	1.14098	0.064829	0.0582395	0.112378	0.313338	0.0815052	0.0941447	0.0049671	0.297907	10.9002	3.57758	11.9622	1.30844	0.165862	0.0314096	0.0558729
COX14 liver	0.0489308	0.182612	0.083265	0.0931439	0.093796	0.152845	0.0609504	0.0749667	0.178761	0.0670128	0.201978	0.863524	2.09757	0.0720301	0.161096	0.248868	0.0814129	1.14032	17.2363	9.36386	0.217574	0.0287887	0.0410403	0.150552	0.136356	0.337432	0.146563	0.0173802	0.0347294	0.930834	15.8787	5.40224	8.87251	1.0423	0.0552208	0.0697574	0.122997	0.329934	0.105317	0.124743	0.0263106	0.322406	11.5177	4.55273	10.0648	1.391	0.199551	0.0350077	0.0656124
COX14 liver	0.0338456	0.163832	0.0674811	0.0802844	0.0979244	0.165982	0.0692931	0.0776887	0.168957	0.0529718	0.246239	1.12443	2.02921	0.0774645	0.152646	0.215758	0.0667223	1.48806	17.5247	10.3615	0.213376	0.0266214	0.0399274	0.115183	0.124013	0.294312	0.132524	0.0214235	0.0401673	1.17832	14.8488	6.45841	9.15476	1.20436	0.0472017	0.0508658	0.116549	0.245603	0.105282	0.12111	0.0142572	0.340865	9.75925	5.17872	8.92877	1.67966	0.211736	0.0325239	0.0758915
COX14 liver	0.0409682	0.164184	0.077042	0.0832163	0.13874	0.157456	0.0534263	0.0473408	0.176476	0.0685597	0.199089	0.966304	1.98963	0.0660312	0.153093	0.222677	0.0764107	1.27208	17.3053	9.01004	0.262856	0.0339576	0.0366054	0.126465	0.122835	0.3013	0.138395	0.0181438	0.0128645	1.02813	16.2253	5.63117	9.28693	1.01619	0.0501965	0.0530543	0.104827	0.270228	0.108358	0.12292	0.0323366	0.353211	11.1086	4.61817	9.778	1.48543	0.192148	0.0397937	0.0683695
COX14 liver	0.0361626	0.0753742	0.044526	0.0416276	0.0337823	0.0992563	0.0263441	0	0.135378	0.0331563	0.110767	0.501557	1.97312	0.0344192	0.109966	0.171894	0.081691	1.08971	17.0052	6.09309	0.235871	0.0174045	0.0367307	0.124707	0.109928	0.31757	0.131064	0.0277421	0.0201693	0.739195	15.4873	4.37116	10.8561	1.02355	0.0729366	0.0690309	0.115678	0.347134	0.0890797	0.116894	0.0366615	0.312646	12.8038	3.75609	13.058	1.27239	0.199298	0.0432272	0.0762177
COX14 liver	0.0436338	0.123574	0.0462738	0.0765297	0.0382016	0.129854	0.0518259	0.0849436	0.183927	0.0427706	0.186105	0.815619	2.49898	0.0640213	0.17829	0.300835	0.108002	1.18842	18.1171	10.0073	0.302254	0.028916	0.0577078	0.160913	0.148779	0.450476	0.229311	0.0332462	0.017195	0.710116	14.6691	6.59166	9.77299	1.23478	0.0974709	0.0689372	0.151082	0.38727	0.175697	0.183815	0.0412623	0.29742	9.56415	4.72553	9.32061	1.41155	0.273094	0.0498332	0.0655348
COX14 liver	0.0370825	0.17874	0.0723558	0.0765007	0.0936473	0.116556	0.0500822	0.0852679	0.170738	0.0565273	0.178251	0.688259	2.13909	0.0716859	0.151937	0.208722	0.0716322	1.21318	20.1552	7.89622	0.257038	0.016913	0.0467952	0.133061	0.128529	0.370507	0.132202	0.0223107	0.0174481	0.797604	14.5897	5.24264	10.4514	1.10176	0.0557707	0.0581452	0.115589	0.326737	0.103089	0.13156	0.0283096	0.290695	11.3597	3.94457	10.1004	1.19651	0.160307	0.0424124	0.0810675
COX14 liver	0.0305316	0.12301	0.068739	0.0766024	0.0785481	0.102178	0.0356716	0.0382241	0.147839	0.0497285	0.148879	0.606972	1.83086	0.0661623	0.134278	0.200755	0.0724954	1.15033	15.723	6.41581	0.251389	0.0190721	0.045145	0.133557	0.116127	0.364781	0.139173	0.0231037	0.0190723	0.834228	13.9245	5.12486	11.7721	1.30073	0.0736192	0.0539764	0.125749	0.406306	0.1023	0.140085	0.0315923	0.301638	10.638	4.61768	14.1203	1.61828	0.192193	0.0350291	0.0750542
COX14 liver	0.039365	0.173645	0.0755244	0.0804545	0.125167	0.125999	0.0493812	0.0634307	0.166869	0.0594379	0.197152	0.688028	1.99855	0.0740197	0.146444	0.206075	0.0646066	1.18007	17.7496	7.70673	0.220615	0.0239844	0.0412851	0.136837	0.142257	0.319913	0.140219	0.0221111	0.0291107	0.773345	16.0374	5.09731	9.4417	0.969996	0.0675157	0.0703283	0.135508	0.348822	0.107778	0.121836	0.0281562	0.327405	11.6168	4.53604	11.2166	1.36572	0.21903	0.0401451	0.0913478
average mol%
	O-30:2	O-30:1	O-30:0	30:2	30:1	30:0	O-32:2	O-32:1	O-32:0	32:3	32:2	32:1	32:0	O-34:3	O-34:2	O-34:1	O-34:0	34:3	34:2	34:1	34:0	O-36:6	O-36:5	O-36:4	O-36:3	O-36:2	O-36:1	O-36:0	36:6	36:5	36:4	36:3	36:2	36:1	36:0	O-38:6	O-38:5	O-38:4	O-38:3	O-38:2	O-38:1	38:7	38:6	38:5	38:4	38:3	38:2	38:1	38:0
WT liver	0.0561788	0.22691	0.0686262	0.133149	0.116599	0.128809	0.076911	0.0953101	0.155586	0.0621127	0.171585	0.848498	1.98272	0.122667	0.159882	0.225708	0.0893478	1.30616	17.3851	8.27105	0.259021	0.027615	0.0567475	0.152694	0.125062	0.317085	0.132386	0.0236533	0.0123319	1.00602	15.3577	5.72544	10.0688	1.25709	0.0679924	0.0621993	0.131271	0.326814	0.101893	0.106393	0.0174594	0.325698	10.3265	4.52342	11.0655	1.45574	0.184485	0.0337665	0.0644475
COX14 liver	0.038815	0.148121	0.0669009	0.0760449	0.0874758	0.131266	0.0496218	0.0589828	0.166118	0.0537706	0.183557	0.781836	2.06963	0.0657293	0.148469	0.221948	0.0778716	1.21527	17.602	8.35682	0.245122	0.0244572	0.0431546	0.135159	0.128603	0.344537	0.148681	0.0231827	0.0238446	0.873972	15.2076	5.48993	9.95107	1.11171	0.0649915	0.061762	0.123497	0.332754	0.112113	0.13287	0.0298608	0.318286	11.046	4.49119	10.8234	1.42757	0.20592	0.0397466	0.0748869
stdev
	O-30:2	O-30:1	O-30:0	30:2	30:1	30:0	O-32:2	O-32:1	O-32:0	32:3	32:2	32:1	32:0	O-34:3	O-34:2	O-34:1	O-34:0	34:3	34:2	34:1	34:0	O-36:6	O-36:5	O-36:4	O-36:3	O-36:2	O-36:1	O-36:0	36:6	36:5	36:4	36:3	36:2	36:1	36:0	O-38:6	O-38:5	O-38:4	O-38:3	O-38:2	O-38:1	38:7	38:6	38:5	38:4	38:3	38:2	38:1	38:0
WT liver	0.0120392	0.0594374	0.00719792	0.0364974	0.0198675	0.0299238	0.021416	0.0327906	0.0343297	0.00919267	0.0308222	0.219301	0.316274	0.0370594	0.0339298	0.0535971	0.0193042	0.174278	1.76342	1.78437	0.0401346	0.00722008	0.00851975	0.0242632	0.0197249	0.0479634	0.0332118	0.00707595	0.0116134	0.188824	0.844385	0.884003	0.905387	0.209165	0.00853694	0.00723339	0.0157	0.0435179	0.0163952	0.024258	0.010484	0.0517696	1.13291	0.556178	1.72957	0.258679	0.0236535	0.00681427	0.0120395
COX14 liver	0.0057797	0.0374332	0.0141652	0.0149596	0.0370838	0.0252801	0.0134768	0.0293634	0.016446	0.0119327	0.0400536	0.202097	0.196164	0.0134438	0.0199554	0.0384858	0.0136549	0.122596	1.24902	1.59062	0.0297915	0.00620441	0.00688219	0.0146086	0.0131603	0.0508263	0.0329857	0.00515657	0.00967042	0.161324	0.819386	0.734811	0.993926	0.12033	0.0165387	0.00853461	0.0142981	0.0539785	0.0263951	0.0218092	0.00798891	0.0218284	1.0528	0.447963	1.85383	0.163075	0.0322072	0.00558058	0.00868433
[truncated: 5 more columns]

## Sheet: LPC
C:\LipidView Data\LV Results\220804_05_XtrIL_PeterRehling_LPDS_Pos_PS_NL_QTRAP_LPC_TM.txt
	sample number	sample vol [ul]	LPC std input [pmol]	LPC [pmol] before corr	LPC [pmol] after corr	LPC [uM]
WT liver	sample.1	14	5	19.0435	17.096	1.22114
WT liver	sample.2	13	5	18.1484	16.3813	1.2601
WT liver	sample.3	13	5	18.4692	16.6274	1.27903
WT liver	sample.4	13	5	16.2896	14.4649	1.11268
WT liver	sample.5	26	5	16.0441	14.3202	0.550778
WT liver	sample.6	16	5	16.2486	14.4969	0.906059
WT liver	sample.7	18	5	13.8591	12.215	0.67861
WT liver	sample.8	15	5	12.9253	11.3011	0.753405
COX14 liver	sample.9	13	5	17.792	15.8408	1.21852
COX14 liver	sample.10	17	5	18.1109	16.1965	0.952733
COX14 liver	sample.11	11	5	16.481	14.6151	1.32865
COX14 liver	sample.12	12	5	18.5232	16.5981	1.38318
COX14 liver	sample.13	22	5	29.8903	27.9391	1.26996
COX14 liver	sample.14	15	5	14.1155	12.2593	0.817287
COX14 liver	sample.15	16	5	18.4863	16.6042	1.03776
COX14 liver	sample.16	13	5	17.1878	15.3655	1.18196
LPC mol%
	14:1	14:0	16:1	16:0	18:3	18:2	18:1	18:0	20:6	20:5	20:4	20:3	20:2	20:1	20:0	22:6	22:5	22:4	22:3	22:2	22:1
WT liver	0.00799004	0.361373	3.33705	27.2992	0.577251	12.5022	6.06118	21.0359	0.255882	0.699071	13.6341	1.56054	0.58644	0	0.289669	5.92462	0.411172	3.73041	0.527418	0.508169	0.690446
WT liver	0	0.582823	3.91083	24.4428	0.391831	12.0995	6.62628	22.7731	0.31394	0.750436	14.1038	2.09214	0.664364	0	0.375815	6.3577	0.850507	2.86053	0.330466	0.259143	0.213926
WT liver	0	0.462777	4.14414	25.442	0.606154	14.0073	9.09389	16.0895	0.537566	1.03627	12.7757	1.88168	0.813489	0.0262357	0.966136	6.62616	0.698457	3.43388	0.398953	0.306485	0.653341
WT liver	0	1.1337	4.05784	24.2848	0.84136	14.1736	7.47834	14.7697	0.727005	0.806342	13.2836	1.59716	1.58354	0.488405	0.686013	5.57797	1.24055	6.09602	0.335485	0.452686	0.385846
WT liver	0	0.454221	2.85393	28.8722	0.368134	13.6107	8.82712	17.7988	0.00893639	0.55737	13.858	1.87353	0.583976	0	0.250011	5.13713	0.905013	3.60661	0.166037	0.268236	0
WT liver	0	0.590053	1.92941	29.3522	0.496777	14.1858	9.21912	19.2843	0.316565	0.749767	10.8214	1.85331	0.795804	0	0.463674	5.43463	0.928466	2.81911	0.441387	0.318359	0
WT liver	0	0.790681	5.70346	29.1776	0.533117	12.3823	6.24605	18.804	0.254631	0.775697	12.2988	1.38991	0.674462	0	0.302762	6.31742	0.920081	3.10267	0.0267405	0.299587	0
WT liver	0	0.156002	2.37352	29.1493	0.448039	12.2958	5.87152	21.0467	0	0.553566	13.2403	1.12941	0.433102	0	0.476372	6.50613	0.870498	3.36175	1.88743	0.200517	0
COX14 liver	0.0760716	0.408263	1.30303	27.3378	0.451902	13.2551	7.63983	17.3882	0.0877424	0.680889	14.5408	2.03942	0.984407	0.771119	0.610433	8.08652	1.2025	1.82849	0.412813	0.101052	0.793543
COX14 liver	0	0.0926214	1.1134	28.0764	0.543261	15.157	9.35396	14.79	0.240406	0.837521	14.6036	2.50918	0.53306	0.470295	0.212171	7.41557	0.69151	2.24166	0	0.234536	0.883786
COX14 liver	0	0.351074	0.836655	27.8894	0.399498	14.7829	7.94176	17.1231	0.274745	0.503464	15.0096	2.14822	0.494224	0.692506	0.529589	7.61476	0.913416	1.21586	0.126769	0.221295	0.931117
COX14 liver	0	0.467488	1.44367	32.4138	0.632685	16.0587	5.95028	17.8602	0.432128	0.707039	11.2449	1.409	0.540447	0.470482	0.918935	6.83796	0.71619	1.08141	0.300396	0.112045	0.402286
COX14 liver	0.885398	1.36427	2.0541	32.9049	0.574967	13.4601	9.14042	14.3219	0.266064	0.78159	8.92849	1.47571	0.936225	1.98752	0.491551	4.53006	0.947889	2.07339	0.657621	0.460725	1.75707
COX14 liver	0	0.0967893	0.819435	31.3281	0.542502	15.3378	7.84161	18.6059	0.0453193	0.466242	12.5359	1.47458	0.897785	0.39221	0.101937	6.67018	0.632856	1.56463	0.0439825	0.0828119	0.519402
COX14 liver	0	0.307799	2.63279	23.1407	0.1592	13.5479	13.6485	21.1789	0.224931	0.597635	12.2863	1.47133	0.437056	0.543993	0.480517	5.91997	0.792769	1.47811	0.45952	0.153006	0.539159
COX14 liver	0	0.142142	0.954488	28.2107	0.382525	13.7989	7.17955	19.0392	0.363503	0.876945	14.5129	1.82275	0.566898	0.887808	0.523	6.92903	0.744794	1.55971	0.208456	0.296179	1.00041
average mol%
	14:1	14:0	16:1	16:0	18:3	18:2	18:1	18:0	20:6	20:5	20:4	20:3	20:2	20:1	20:0	22:6	22:5	22:4	22:3	22:2	22:1
WT liver	0.000998755	0.566454	3.53877	27.2525	0.532833	13.1571	7.42794	18.9502	0.301816	0.741065	13.002	1.67221	0.766897	0.0643301	0.476307	5.98522	0.853093	3.62637	0.51424	0.326648	0.242945
COX14 liver	0.120184	0.403806	1.3947	28.9127	0.460817	14.4248	8.58698	17.5384	0.241855	0.681416	12.9578	1.79377	0.673763	0.776992	0.483517	6.75051	0.830241	1.63041	0.276195	0.207706	0.853346
stdev
	14:1	14:0	16:1	16:0	18:3	18:2	18:1	18:0	20:6	20:5	20:4	20:3	20:2	20:1	20:0	22:6	22:5	22:4	22:3	22:2	22:1
WT liver	0.00282491	0.294412	1.19031	2.21416	0.150255	0.918822	1.42798	2.6854	0.244346	0.152798	1.05448	0.313043	0.351813	0.171598	0.242112	0.550736	0.233759	1.05084	0.57682	0.102762	0.299054
COX14 liver	0.310337	0.413716	0.642954	3.20859	0.149752	1.04384	2.30884	2.23105	0.128361	0.15037	2.12609	0.405973	0.224508	0.517576	0.247468	1.11101	0.184877	0.399081	0.225346	0.126416	0.424697

## Sheet: SM
C:\LipidView Data\LV Results\220804_05_XtrIL_PeterRehling_LPDS_Pos_PS_NL_QTRAP_SM_Controls_TM.txt
	sample number	sample vol [ul]	SM std input [pmol]	SM [pmol] before corr	SM [pmol] after corr	SM [uM]
WT liver	sample.1	14	50	19.6893	1.40638	1.40638
WT liver	sample.2	13	50	39.0035	3.00027	3.00027
WT liver	sample.3	13	50	48.3492	3.71917	3.71917
WT liver	sample.4	13	50	34.3821	2.64477	2.64477
WT liver	sample.5	26	50	45.9369	1.76681	1.76681
WT liver	sample.6	16	50	43.1582	2.69739	2.69739
WT liver	sample.7	18	50	40.3986	2.24437	2.24437
WT liver	sample.8	15	50	33.9028	2.26019	2.26019
COX14 liver	sample.9	13	50	43.9375	3.3798	3.3798
COX14 liver	sample.10	17	50	45.6524	2.68543	2.68543
COX14 liver	sample.11	11	50	37.7702	3.43365	3.43365
COX14 liver	sample.12	12	50	35.949	2.99575	2.99575
COX14 liver	sample.13	22	50	40.8691	1.85769	1.85769
COX14 liver	sample.14	15	50	35.6597	2.37731	2.37731
COX14 liver	sample.15	16	50	47.1923	2.94952	2.94952
COX14 liver	sample.16	13	50	49.1876	3.78366	3.78366
SM mol%
	34:2;2	34:1;2	34:0;2	36:2;2	36:1;2	36:0;2	38:2;2	38:1;2	38:0;2	40:2;2	40:1;2	40:0;2	42:3;2	42:2;2	42:1;2	42:0;2
WT liver	0.464633	27.3211	0.706804	0.252066	5.3659	0	0	0	0	0	0.621849	0	0	38.7379	25.7695	0.760291
WT liver	0.39963	28.9371	0.90208	0.0987025	6.36492	0	0	0	0	0.0719274	10.7233	0	0	30.5946	21.2952	0.612706
WT liver	0.2475	24.2749	0.823146	0.287921	4.16968	0	0	0	0	0	6.32108	0	1.23666	38.0859	23.8789	0.674363
WT liver	0.21818	27.9373	0.855881	0	3.65955	0	0	0	0	0	4.39031	0	0	39.477	23.1174	0.344354
WT liver	0.566598	29.5979	0.660497	0.180565	5.53659	0	0	0	0	1.11738	3.9884	0	0	36.6188	21.0658	0.667553
WT liver	0.717666	24.208	0.664419	0.326277	4.41254	0	0	0	0	0	4.9949	0	0	39.0541	24.7997	0.82232
WT liver	0.486297	25.4439	0.552059	0.368603	5.44144	0	0	0	0	0	3.29823	0.149267	0	40.3961	22.9748	0.889277
WT liver	0.490917	26.0788	1.43333	0.34605	5.91391	0	0	0	0	0	6.14978	0	0	36.1387	22.4302	1.01836
COX14 liver	0.714016	26.1866	1.45873	0.22721	3.47002	0	0	0	0	0	7.84092	0.0212609	0	37.9073	21.2565	0.91741
COX14 liver	0.357217	26.5721	1.43606	0.249198	4.13826	0.547247	0	0	0	0	10.4481	0	0	34.6593	20.7867	0.805782
COX14 liver	0.43277	25.4985	0.849166	0.00747613	4.25878	0	0	0	0	0	6.91271	0	0	39.3754	22.0156	0.649594
COX14 liver	0.356472	28.4832	2.13416	0.0775428	6.32612	0.591215	0	0	0	0	4.27577	0	0	36.4235	20.9262	0.405819
COX14 liver	0.682777	27.6704	1.67341	0.179743	4.43208	0.371047	0	0	0	0	6.09674	0	0	38.0775	20.1078	0.708564
COX14 liver	0.331237	26.7428	1.52397	0.133146	4.22842	0.133189	0	0	0	0	4.36633	0	0	40.3522	22.1887	0
COX14 liver	0.427442	26.8296	1.38256	0.298507	5.10832	0.746507	0	0	0	0.872928	2.36268	0	0	38.5417	21.8714	1.55841
COX14 liver	0.578155	24.0875	0.887256	0.140137	3.26069	0	0	0	0	3.30537	10.4405	0	0	36.8439	19.6306	0.825954
average mol%
	34:2;2	34:1;2	34:0;2	36:2;2	36:1;2	36:0;2	38:2;2	38:1;2	38:0;2	40:2;2	40:1;2	40:0;2	42:3;2	42:2;2	42:1;2	42:0;2
WT liver	0.448928	26.7249	0.824776	0.232523	5.10807	0	0	0	0	0.148663	5.06098	0.0186584	0.154583	37.3879	23.1664	0.723653
COX14 liver	0.485011	26.5088	1.41816	0.16412	4.40284	0.298651	0	0	0	0.522288	6.59297	0.00265761	0	37.7726	21.0979	0.733942
stdev
	34:2;2	34:1;2	34:0;2	36:2;2	36:1;2	36:0;2	38:2;2	38:1;2	38:0;2	40:2;2	40:1;2	40:0;2	42:3;2	42:2;2	42:1;2	42:0;2
WT liver	0.162885	2.0483	0.272101	0.130012	0.929888	0	0	0	0	0.392228	2.90941	0.0527738	0.437226	3.08918	1.62334	0.202524
COX14 liver	0.15249	1.33076	0.413668	0.0949362	0.963135	0.304294	0	0	0	1.16528	2.92267	0.00751685	0	1.78491	0.919238	0.44419

[truncated: 16 more sheets: PE, plPE16_0, plPE18_1, plPE18_0, PS, PI, PG, PA, Cer, HexCer, Hex2Cer, Chol, CE, DAG, TAG, mol % lipids]
