# Supplementary material for: Defective mitochondrial COX1 translation due to loss of COX14 function triggers ROS-induced inflammation in mouse liver
Source: Nat Commun. 2024 Aug 12;15:6914. doi: 10.1038/s41467-024-51109-y (PMC11319346; doi:10.1038/s41467-024-51109-y)
Supplement: Supplementary file 7 — Source Data [file 41467_2024_51109_MOESM7_ESM.xlsx]

## Sheet: Fig1b
% of WT
	Brain			Liver			Sk. mus.			Heart			Eye			Kidney			Spleen
COX14M19I	1.24817	1	0.964402	0.847286	1	1.23247	1.04173	0.808502	1	1.2809	1.31992	0.831096	1.2	1.04	1.13	1.05	1.05	0.83	1.11	1.17	1.09
	Mouse 1	Mouse 2	Mouse 3	Mouse 1	Mouse 2	Mouse 3	Mouse 1	Mouse 2	Mouse 3	Mouse 1	Mouse 2	Mouse 3	Mouse 1	Mouse 2	Mouse 3	Mouse 1	Mouse 2	Mouse 3	Mouse 1	Mouse 2	Mouse 3

## Sheet: Fig1c
% of WT									Statistical analysis
COX14M19I	Brain	Liver	Sk. mus.	Heart	Eye	Kidney	Spleen		Column D	COX14M19I Brain
Mouse 1	83.6	40.1	66	75.6	84.3	77.1	49.3		vs.	vs.
Mouse 2	71.6	52.2	62.2	76.9	56.8	70.5	64		Column C	WT Brain
Mouse 3	69.4	37.5	55.4	67.1	114.3*	70.2	69.6
Mouse 4	36.7	29.4	53.7	69.2	59	92	95.3		Unpaired t test
									P value	0.0175
Blue values are identified as outliers via ROUT method in Graph Pad Prism and excluded from the analysis.									P value summary	*
									Significantly different (P < 0.05)?	Yes
									One- or two-tailed P value?	Two-tailed
									t, df	t=3.247, df=6
									How big is the difference?
									Mean of column C	95.1
									Mean of column D	62.13
									Difference between means (D - C) ± SEM	-32.98 ± 10.15
									95% confidence interval	-57.82 to -8.128
									R squared (eta squared)	0.6374
									F test to compare variances
									F, DFn, Dfd	7.622, 3, 3
									P value	0.1293
									P value summary	ns
									Significantly different (P < 0.05)?	No
									Data analyzed
									Sample size, column C	4
									Sample size, column D	4
									Column F	COX14M19I Liver
									vs.	vs.
									Column E	WT Liver
									Unpaired t test
									P value	<0.0001
									P value summary	****
									Significantly different (P < 0.05)?	Yes
									One- or two-tailed P value?	Two-tailed
									t, df	t=9.423, df=6
									How big is the difference?
									Mean of column E	89
									Mean of column F	35.43
									Difference between means (F - E) ± SEM	-53.58 ± 5.686
									95% confidence interval	-67.49 to -39.66
									R squared (eta squared)	0.9367
									F test to compare variances
									F, DFn, Dfd	1.177, 3, 3
									P value	0.8966
									P value summary	ns
									Significantly different (P < 0.05)?	No
									Data analyzed
									Sample size, column E	4
									Sample size, column F	4
									Column H	COX14M19I Muscle
									vs.	vs.
									Column G	WT Muscle
									Unpaired t test
									P value	0.0242
									P value summary	*
									Significantly different (P < 0.05)?	Yes
									One- or two-tailed P value?	Two-tailed
									t, df	t=2.993, df=6
									How big is the difference?
									Mean of column G	83.8
									Mean of column H	49.7
									Difference between means (H - G) ± SEM	-34.10 ± 11.39
									95% confidence interval	-61.98 to -6.220
									R squared (eta squared)	0.5988
									F test to compare variances
									F, DFn, Dfd	21.22, 3, 3
									P value	0.032
									P value summary	*
									Significantly different (P < 0.05)?	Yes
									Data analyzed
									Sample size, column G	4
									Sample size, column H	4
									Column B	COX14M19I Heart
									vs.	vs.
									Column A	WT Heart
									Unpaired t test
									P value	0.0771
									P value summary	ns
									Significantly different (P < 0.05)?	No
									One- or two-tailed P value?	Two-tailed
									t, df	t=2.131, df=6
									How big is the difference?
									Mean of column A	107.7
									Mean of column B	77.75
									Difference between means (B - A) ± SEM	-29.95 ± 14.05
									95% confidence interval	-64.33 to 4.432
									R squared (eta squared)	0.4309
									F test to compare variances
									F, DFn, Dfd	28.78, 3, 3
									P value	0.0207
									P value summary	*
									Significantly different (P < 0.05)?	Yes
									Data analyzed
									Sample size, column A	4
									Sample size, column B	4
									Column N	COX14M19I Eye
									vs.	vs.
									Column M	WT Eye
									Unpaired t test
									P value	0.6555
									P value summary	ns
									Significantly different (P < 0.05)?	No
									One- or two-tailed P value?	Two-tailed
									t, df	t=0.4693, df=6
									How big is the difference?
									Mean of column M	44.15
									Mean of column N	34.7
									Difference between means (N - M) ± SEM	-9.450 ± 20.14
									95% confidence interval	-58.73 to 39.83
									R squared (eta squared)	0.0354
									F test to compare variances
									F, DFn, Dfd	10.62, 3, 3
									P value	0.0835
									P value summary	ns
									Significantly different (P < 0.05)?	No
									Data analyzed
									Sample size, column M	4
									Sample size, column N	4
									Column L	COX14M19I Kidney
									vs.	vs.
									Column K	WT Kidney
									Unpaired t test
									P value	0.0393
									P value summary	*
									Significantly different (P < 0.05)?	Yes
									One- or two-tailed P value?	Two-tailed
									t, df	t=2.626, df=6
									How big is the difference?
									Mean of column K	83.15
									Mean of column L	64.38
									Difference between means (L - K) ± SEM	-18.78 ± 7.150
									95% confidence interval	-36.27 to -1.279
									R squared (eta squared)	0.5347
									F test to compare variances
									F, DFn, Dfd	1.823, 3, 3
									P value	0.6342
									P value summary	ns
									Significantly different (P < 0.05)?	No
									Data analyzed
									Sample size, column K	4
									Sample size, column L	4
									Column J	COX14M19I Spleen
									vs.	vs.
									Column I	WT Spleen
									Unpaired t test
									P value	0.1649
									P value summary	ns
									Significantly different (P < 0.05)?	No
									One- or two-tailed P value?	Two-tailed
									t, df	t=1.581, df=6
									How big is the difference?
									Mean of column I	132.5
									Mean of column J	92.18
									Difference between means (J - I) ± SEM	-40.33 ± 25.50
									95% confidence interval	-102.7 to 22.07
									R squared (eta squared)	0.2942
									F test to compare variances
									F, DFn, Dfd	3.031, 3, 3
									P value	0.3868
									P value summary	ns
									Significantly different (P < 0.05)?	No
									Data analyzed
									Sample size, column I	4
									Sample size, column J	4

## Sheet: Fig1e
Time (min)	WT			COX14M19I
0	1	1	1	1	1	1
20	1.02	0.9	1.02	0.92	0.7	0.77
60	0.98	0.7	0.81	0.77	0.53	0.68

## Sheet: Fig1g
% of WT									Statistics
Brain		Heart		Liver		Muscle			Number of families	1
WT	COX14M19I	WT	COX14M19I	WT	COX14M19I	WT	COX14M19I		Number of comparisons per family	4
70	82	105.03	25.8876	98.4791	50.9506	66.6667	222.2222222*		Alpha	0.05
122	62	92.4556	39.2012	104.183	46.7681	113.58	101.235
96	80	102.811	34.0237	97.7186	52.8517	128.395	74.0741		Šídák's multiple comparisons test	Mean Diff.	95.00% CI of diff.	Below threshold?	Summary	Adjusted P Value
124	62	97.6331	36.2426	95.8175	45.2471	91.358	88.8889		WT vs. COX14M19I Brain	27.2	2.555 to 51.85	Yes	*	0.0257	A-B
88	78	102.071	34.0237	103.802	45.6274	197.5308642*	54.321		WT vs. COX14M19I Liver	66.12	41.48 to 90.77	Yes	****	<0.0001	C-D
					42.5856		49.3827		WT vs. COX14M19I Heart	52.66	29.07 to 76.26	Yes	****	<0.0001	E-F
									WT vs. COX14M19I Muscle	26.42	0.2797 to 52.56	Yes	*	0.0468	G-H
Blue values are identified as outliers via ROUT method in Graph Pad Prism and excluded from the analysis.									Test details	Mean 1	Mean 2	Mean Diff.	SE of diff.	n1	n2	t	DF
									WT vs. COX14M19I Brain	100	72.8	27.2	9.339	5	5	2.912	32
									WT vs. COX14M19I Liver	100	33.88	66.12	9.339	5	5	7.08	32
									WT vs. COX14M19I Heart	100	47.34	52.66	8.942	5	6	5.89	32
									WT vs. COX14M19I Muscle	100	73.58	26.42	9.906	4	5	2.667	32

## Sheet: Fig1h
	OCR (pmol/min)
Time (min)	WT						COX14M19I
3	-18.5429	-18.5073	-2.16222	-5.6062	-17.6356	-10.5881	-23.37	-16.6836	-11.5395	-10.1888	-18.7206	-18.3596
9	533.055	335.275	268.453	257.011	272.894	221.535	345.096	184.738	162.422	159.048	163.473	142.784
15	501.069	336.505	296.006	268.258	282.313	229.557	335.877	187.618	162.424	160.578	168.1	139.141
21	472.768	327.336	302.438	270.216	287.083	234.482	324.854	186.106	138.651	161.208	168.843	134.328
27	400.579	228.693	236.547	252.074	220.324	190.846	253.754	141.697	143.699	123.012	132.458	114.471
33	371.612	217.563	232.105	306.731	218.359	181.71	233.194	128.172	142.504	115.497	126.578	103.795
39	337.231	186.696	216.852	330.726	194.058	189.018	203.443	119.195	128.598	104.841	125.277	97.0297
45	542.736	472.836	447.09	275.01	499.008	505.552	192.452	256.561	227.983	209.671	247.076	181.159
51	495.064	470.676	476.251	275.353	479.173	476.46	119.519	271.202	244.375	216.375	271.85	222.74
57	459.781	457.14	466.664	285.902	466.706	468.444	119.231	257.283	254.235	226.473	278.758	218.591
63	194.55	124.871	167.945	430.019	144.881	220.027	128.86	59.5923	181.23	92.8899	244.63	70.254
69	209.398	131.408	153.202	401.08	128.103	246.986	142.426	50.891	135.122	90.6556	198.423	56.6638
	well 1	well 2	well 3	well 4	well 5	well 6	well 1	well 2	well 3	well 4	well 5	well 6
Graph is representative of 1 run

## Sheet: Fig2a
	Body Weight(g)					Statistics
	WT females	WT males	COX14M19I females	COX14M19I males		Number of families	1
	23.9	28.4	25.3	28.2		Number of comparisons per family	6
	26.2	30.3	25.3	28.1		Alpha	0.05
	24.3	31.8	22.9	28.7
	22.7	31.5	22.3	25.1		Tukey's multiple comparisons test	Mean Diff.	95.00% CI of diff.	Below threshold?	Summary	Adjusted P Value
	25.6	34	22.2	26.3		WT females vs. WT males	-7.158	-9.283 to -5.033	Yes	****	<0.0001	A-B
	25.3	31.2	22.1	25.5		WT females vs. COX14M19I females	0.7407	-1.521 to 3.002	No	ns	0.8207	A-C
	23.6	32.5	19.9	32.1		WT females vs. COX14M19I males	-4.659	-6.921 to -2.398	Yes	****	<0.0001	A-D
	23.9	30.4	23.6	29.3		WT males vs. COX14M19I females	7.898	5.575 to 10.22	Yes	****	<0.0001	B-C
	22.7	30.1	26.2	34		WT males vs. COX14M19I males	2.498	0.1750 to 4.822	Yes	*	0.0305	B-D
	23.1	35.5	26.5	33.3		COX14M19I females vs. COX14M19I males	-5.4	-7.849 to -2.951	Yes	****	<0.0001	C-D
	24.2	37.4	25.3	29.8
	26.3	31.6	26.9	32.9		Test details	Mean 1	Mean 2	Mean Diff.	SE of diff.	n1	n2	q	DF
	25.2	33.4				WT females vs. WT males	24.78	31.94	-7.158	0.8007	17	15	12.64	52
	25.6	29.1				WT females vs. COX14M19I females	24.78	24.04	0.7407	0.8522	17	12	1.229	52
	26.2	31.9				WT females vs. COX14M19I males	24.78	29.44	-4.659	0.8522	17	12	7.732	52
	27.6					WT males vs. COX14M19I females	31.94	24.04	7.898	0.8754	15	12	12.76	52
	24.9					WT males vs. COX14M19I males	31.94	29.44	2.498	0.8754	15	12	4.036	52
						COX14M19I females vs. COX14M19I males	24.04	29.44	-5.4	0.9227	12	12	8.276	52
						Compact letter display
						WT males	A
						COX14M19I males	B
						WT females	C
						COX14M19I females	C

## Sheet: Fig2b
	Days	Number of dead mice			Statistics
		WT	COX14		Comparison of Survival Curves
	1	0	0
	2	0	0		Log-rank (Mantel-Cox) test
	3	0	0		Chi square	14.98
	4	0	0		df	1
	5	0	0		P value	0.0001
	6	0	0		P value summary	***
	7	0	0		Are the survival curves sig different?	Yes
	8	0	0
	9	0	0		Gehan-Breslow-Wilcoxon test
	10	0	0		Chi square	15.26
	11	0	0		df	1
	12	0	0		P value	<0.0001
	13	0	0		P value summary	****
	14	0	0		Are the survival curves sig different?	Yes
	15	0	0
	16	0	0		Median survival
	17	0	0		WT	674
	18	0	0		COX14M19I	374
	19	0	0		Ratio (and its reciprocal)	1.802	0.5549
	20	0	0		95% CI of ratio	0.8277 to 3.924	0.2549 to 1.208
	21	0	0
	22	0	0		Hazard Ratio (Mantel-Haenszel)	A/B	B/A
	23	0	0		Ratio (and its reciprocal)	0.1085	9.214
	24	0	0		95% CI of ratio	0.03525 to 0.3341	2.993 to 28.36
	25	0	0
	26	0	0		Hazard Ratio (logrank)	A/B	B/A
	27	0	0		Ratio (and its reciprocal)	0.2666	3.75
	28	0	0		95% CI of ratio	0.09432 to 0.7538	1.327 to 10.60
	29	0	0
	30	0	0
	31	0	0
	32	0	0
	33	0	0
	34	0	0
	35	0	0
	36	0	0
	37	0	0
	38	0	0
	39	0	0
	40	0	0
	41	0	0
	42	0	0
	43	0	0
	44	0	0
	45	0	0
	46	0	0
	47	0	0
	48	0	0
	49	0	0
	50	0	0
	51	0	0
	52	0	0
	53	0	0
	54	0	0
	55	0	0
	56	0	0
	57	0	0
	58	0	0
	59	0	0
	60	0	0
	61	0	0
	62	0	0
	63	0	0
	64	0	0
	65	0	0
	66	0	0
	67	0	0
	68	0	0
	69	0	0
	70	0	0
	71	0	0
	72	0	0
	73	0	0
	74	0	0
	75	0	0
	76	0	0
	77	0	0
	78	0	0
	79	0	0
	80	0	0
	81	0	0
	82	0	0
	83	0	0
	84	0	0
	85	0	0
	86	0	0
	87	0	0
	88	0	0
	89	0	0
	90	0	0
	91	0	0
	92	0	0
	93	0	0
	94	0	0
	95	0	0
	96	0	0
	97	0	0
	98	0	0
	99	0	0
	100	0	0
	101	0	0
	102	0	0
	103	0	0
	104	0	0
	105	0	0
	106	0	0
	107	0	0
	108	0	0
	109	0	0
	110	0	0
	111	0	0
	112	0	0
	113	0	0
	114	0	0
	115	0	0
	116	0	0
	117	0	0
	118	0	0
	119	0	0
	120	0	0
	121	0	1
	122	0	0
	123	0	0
	124	0	0
	125	0	0
	126	0	0
	127	0	0
	128	0	0
	129	0	0
	130	0	0
	131	0	0
	132	0	0
	133	0	0
	134	0	0
	135	0	0
	136	0	0
	137	0	0
	138	0	0
	139	0	0
	140	0	0
	141	0	0
	142	0	0
	143	0	0
	144	0	0
	145	0	0
	146	0	0
	147	0	0
	148	0	0
	149	0	0
	150	0	0
	151	0	0
	152	0	0
	153	0	0
	154	0	0
	155	0	0
	156	0	0
	157	0	0
	158	0	0
	159	0	0
	160	0	0
	161	0	0
	162	0	0
	163	0	0
	164	0	0
	165	0	0
	166	0	0
	167	0	0
	168	0	0
	169	0	1
	170	0	0
	171	0	0
	172	0	0
	173	0	0
	174	0	0
	175	0	0
	176	0	0
	177	0	0
	178	0	0
	179	0	0
	180	0	0
	181	0	0
	182	0	0
	183	0	0
	184	0	0
	185	0	0
	186	0	0
	187	0	0
	188	0	0
	189	0	0
	190	0	0
	191	0	0
	192	0	0
	193	0	0
	194	0	0
	195	0	0
	196	0	0
	197	0	0
	198	0	0
	199	0	0
	200	0	0
	201	0	0
	202	0	0
	203	0	0
	204	0	0
	205	0	0
	206	0	0
	207	0	0
	208	0	0
	209	0	0
	210	0	1
	211	0	0
	212	0	0
	213	0	0
	214	0	0
	215	0	0
	216	0	0
	217	0	0
	218	0	0
	219	0	0
	220	0	0
	221	0	0
	222	0	0
	223	0	0
	224	0	0
	225	0	0
	226	0	0
	227	0	0
	228	0	0
	229	0	0
	230	0	0
	231	0	0
	232	0	0
	233	0	0
	234	0	0
	235	0	0
	236	0	0
	237	0	0
	238	0	0
	239	0	0
	240	0	0
	241	0	0
	242	0	0
	243	0	0
	244	0	0
	245	0	0
	246	0	0
	247	0	0
	248	0	1
	249	0	0
	250	0	0
	251	0	0
	252	0	0
	253	0	0
	254	0	0
	255	0	0
	256	0	0
	257	0	0
	258	0	0
	259	0	0
	260	0	0
	261	0	0
	262	0	0
	263	0	0
	264	0	0
	265	0	0
	266	0	0
	267	1	0
	268	0	0
	269	0	0
	270	0	0
	271	0	0
	272	0	0
	273	0	0
	274	0	0
	275	0	0
	276	0	0
	277	0	0
	278	0	0
	279	0	0
	280	0	0
	281	0	0
	282	0	0
	283	0	0
	284	0	0
	285	0	0
	286	0	0
	287	0	0
	288	0	0
	289	0	0
	290	0	0
	291	0	0
	292	0	0
	293	0	0
	294	0	0
	295	0	0
	296	0	0
	297	0	0
	298	0	0
	299	0	0
	300	0	0
	301	0	0
	302	0	0
	303	0	0
	304	0	0
	305	0	0
	306	0	0
	307	0	0
	308	0	0
	309	0	0
	310	0	0
	311	0	0
	312	0	0
	313	0	0
	314	0	0
	315	0	0
	316	0	0
	317	0	0
	318	0	0
	319	0	0
	320	0	0
	321	0	0
	322	0	0
	323	0	0
	324	0	0
	325	0	0
	326	0	0
	327	0	0
	328	0	0
	329	0	0
	330	0	0
	331	0	0
	332	0	0
	333	0	0
	334	0	0
	335	0	0
	336	0	0
	337	0	0
	338	0	0
	339	0	0
	340	0	0
	341	0	0
	342	0	0
	343	0	0
	344	0	0
	345	0	0
	346	0	0
	347	0	0
	348	0	0
	349	0	0
	350	0	0
	351	0	0
	352	0	0
	353	0	0
	354	0	0
	355	0	0
	356	0	0
	357	0	0
	358	0	0
	359	0	0
	360	0	0
	361	0	0
	362	0	0
	363	0	0
	364	0	0
	365	0	0
	366	0	0
	367	0	0
	368	0	0
	369	0	0
	370	0	0
	371	0	0
	372	0	0
	373	0	0
	374	0	2
	375	0	0
	376	0	0
	377	0	0
	378	0	0
	379	0	0
	380	0	0
	381	0	0
	382	0	0
	383	0	0
	384	0	0
	385	0	0
	386	0	0
	387	0	0
	388	0	0
	389	0	0
	390	0	0
	391	0	0
	392	0	0
	393	0	0
	394	0	0
	395	0	1
	396	0	0
	397	0	0
	398	0	0
	399	0	0
	400	0	0
	401	0	0
	402	0	0
	403	0	0
	404	0	0
	405	0	0
	406	0	0
	407	0	0
	408	0	0
	409	0	0
	410	0	0
	411	0	0
	412	0	0
	413	0	0
	414	0	0
	415	0	0
	416	0	0
	417	0	0
	418	0	0
	419	0	1
	420	0	1
	421	0	0
	422	0	0
	423	0	0
	424	0	0
	425	0	0
	426	0	0
	427	0	0
	428	0	0
	429	0	0
	430	0	0
	431	0	0
	432	0	0
	433	0	0
	434	0	0
	435	0	0
	436	0	0
	437	0	0
	438	0	0
	439	0	0
	440	0	0
	441	0	0
	442	0	0
	443	0	0
	444	0	0
	445	0	0
	446	0	0
	447	0	0
	448	0	0
	449	0	0
	450	0	0
	451	0	0
	452	0	0
	453	0	0
	454	0	0
	455	0	0
	456	0	0
	457	0	0
	458	0	0
	459	0	0
	460	0	0
	461	0	0
	462	0	0
	463	0	0
	464	0	0
	465	0	0
	466	0	0
	467	0	0
	468	0	0
	469	0	0
	470	0	0
	471	0	0
	472	0	0
	473	0	0
	474	0	0
	475	0	0
	476	0	0
	477	0	0
	478	0	0
	479	0	0
	480	0	0
	481	0	0
	482	0	0
	483	0	0
	484	0	0
	485	0	0
	486	0	0
	487	0	0
	488	0	0
	489	0	0
	490	0	0
	491	0	0
	492	0	0
	493	0	0
	494	0	0
	495	0	0
	496	0	0
	497	0	0
	498	0	0
	499	0	0
	500	0	0
	501	0	0
	502	0	0
	503	0	0
	504	0	0
	505	0	0
	506	0	0
	507	0	0
	508	0	0
	509	0	0
	510	1	0
	511	0	0
	512	0	0
	513	0	0
	514	0	0
	515	0	0
	516	0	0
	517	0	0
	518	0	0
	519	0	0
	520	0	0
	521	0	0
	522	0	0
	523	0	0
	524	0	0
	525	0	0
	526	0	0
	527	0	0
	528	0	0
	529	0	0
	530	0	0
	531	0	0
	532	0	0
	533	0	0
	534	0	0
	535	0	0
	536	0	0
	537	0	0
	538	0	0
	539	0	0
	540	0	0
	541	0	0
	542	0	0
	543	0	0
	544	0	0
	545	0	0
	546	0	0
	547	0	1
	548	0	0
	549	0	0
	550	0	0
	551	0	0
	552	0	0
	553	0	0
	554	0	0
	555	0	0
	556	0	0
	557	0	0
	558	0	0
	559	0	0
	560	0	0
	561	0	0
	562	0	0
	563	0	0
	564	0	0
	565	0	0
	566	0	0
	567	0	0
	568	0	0
	569	0	0
	570	0	0
	571	0	0
	572	0	0
	573	0	0
	574	0	0
	575	0	0
	576	0	0
	577	0	0
	578	0	0
	579	0	0
	580	0	0
	581	0	0
	582	0	0
	583	0	0
	584	0	0
	585	0	0
	586	0	0
	587	0	0
	588	0	0
	589	0	0
	590	0	0
	591	0	0
	592	0	0
	593	1	0
	594	0	0
	595	0	0
	596	0	0
	597	0	0
	598	0	0
	599	1	0
	600	0	0
	601	0	0
	602	0	0
	603	0	0
	604	0	0
	605	0	0
	606	0	0
	607	0	0
	608	0	0
	609	0	0
	610	0	0
	611	0	0
	612	0	0
	613	0	0
	614	0	0
	615	0	0
	616	0	0
	617	1	0
	618	0	0
	619	1	0
	620	0	0
	621	0	0
	622	0	0
	623	0	0
	624	0	0
	625	0	0
	626	0	0
	627	0	0
	628	0	0
	629	0	0
	630	0	0
	631	0	0
	632	0	0
	633	0	0
	634	0	0
	635	0	0
	636	0	0
	637	0	0
	638	0	0
	639	0	0
	640	0	0
	641	0	0
	642	0	0
	643	0	0
	644	0	0
	645	0	0
	646	0	0
	647	0	0
	648	0	0
	649	0	0
	650	0	0
	651	0	0
	652	0	0
	653	0	0
	654	0	0
	655	0	0
	656	0	0
	657	0	1
	658	0	0
	659	0	0
	660	0	0
	661	0	0
	662	0	0
	663	0	0
	664	0	0
	665	0	0
	666	0	0
	667	0	0
	668	0	0
	669	0	0
	670	0	0
	671	0	0
	672	0	0
	673	0	0
	674	1	0
	675	0	0
	676	0	0
	677	0	0
	678	0	0
	679	0	0
	680	0	0
	681	1	0
	682	0	0
	683	0	0
	684	0	0
	685	0	0
	686	0	0
	687	0	0
	688	0	0
	689	0	0
	690	0	0
	691	0	0
	692	0	0
	693	0	0
	694	0	0
	695	0	0
	696	0	0
	697	0	0
	698	0	0
	699	0	0
	700	0	0
	701	0	0
	702	0	0
	703	0	0
	704	0	0
	705	0	0
	706	0	0
	707	0	0
	708	0	0
	709	0	0
	710	0	0
	711	0	0
	712	0	0
	713	0	0
	714	0	0
	715	0	0
	716	0	0
	717	0	0
	718	0	0
	719	0	0
	720	0	0
	721	0	0
	722	0	0
	723	0	0
	724	0	0
	725	0	0
	726	0	0
	727	0	0
	728	0	0
	729	0	0
	730	0	0
	731	0	0
	732	0	0
	733	0	0
	734	0	0
	735	0	0
	736	0	0
	737	0	0
	738	0	0
	739	0	0
	740	0	0
	741	0	0
	742	0	1
	743	0	0
	744	0	0
	745	0	0
	746	0	0
	747	0	0
	748	0	0
	749	0	0
	750	0	0
	751	0	0
	752	0	0
	753	0	0
	754	0	0
	755	0	0
	756	0	0
	757	0	0
	758	0	0
	759	0	0
	760	0	0
	761	0	0
	762	0	0
	763	0	0
	764	0	0
	765	0	0
	766	0	0
	767	0	0
	768	0	0
	769	0	0
	770	0	0
	771	0	0
	772	0	0
	773	0	0
	774	0	0
	775	0	0
	776	0	0
	777	0	0
	778	0	0
	779	0	0
	780	0	0
	781	0	0
	782	0	0
	783	0	0
	784	1	0
	785	0	0
	786	0	0
	787	0	0
	788	0	0
	789	0	0
	790	1	0
	791	0	0
	792	0	0
	793	0	0
	794	0	0
	795	0	0
	796	0	0
	797	0	0
	798	0	0
	799	0	0
	800	0	0
	801	0	0
	802	0	0
	803	0	0
	804	0	0
	805	0	0
	806	0	0
	807	0	0
	808	0	0
	809	0	0
	810	0	0
	811	0	0
	812	0	0
	813	0	0
	814	0	0
	815	0	0
	816	0	0
	817	0	0
	818	0	0
	819	0	0
	820	0	0
	821	0	0
	822	0	0
	823	0	0
	824	0	0
	825	0	0
	826	0	0
	827	0	0
	828	0	0
	829	0	0
	830	0	0
	831	0	0
	832	0	0
	833	0	0
	834	0	0
	835	0	0
	836	0	0
	837	0	0
	838	0	0
	839	0	0
	840	0	0
	841	0	0
	842	0	0
	843	0	0
	844	0	0
	845	0	0
	846	0	0
	847	1	0
	848	0	0
	849	0	0
	850	0	0
	851	0	0
	852	0	0
	853	0	0
	854	1	0
	855	0	0
	856	0	0
	857	0	0
	858	0	0
	859	0	0
	860	0	0
	861	0	0
	862	0	0
	863	0	0
	864	0	0
	865	0	0
	866	0	0
	867	0	0
	868	0	0
	869	0	0
	870	0	0
	871	0	0
	872	0	0
	873	0	0
	874	0	0
	875	0	0
	876	0	0
	877	0	0
	878	0	0
	879	0	0
	880	0	0
	881	0	0
	882	0	0
	883	0	0
	884	0	0
	885	0	0
	886	0	0
	887	0	0
	888	0	0
	889	0	0
	890	0	0
	891	0	0
	892	0	0
	893	0	0
	894	0	0
	895	0	0
	896	0	0
	897	0	0
	898	0	0
	899	0	0
	900	0	0
	901	0	0
	902	0	0
	903	0	0
	904	0	0
	905	0	0
	906	0	0
	907	0	0
	908	0	0
	909	1	0
	910	0	0
	911	0	0
	912	0	0
	913	0	0
	914	0	0
	915	0	0
	916	0	0
	917	0	0
	918	0	0
	919	0	0
	920	0	0
	921	0	0
	922	0	0
	923	0	0
	924	0	0
	925	0	0
	926	0	0
	927	0	0
	928	0	0
	929	0	0
	930	0	0
	931	0	0
	932	0	0
	933	0	0
	934	0	0
	935	0	0
	936	0	0
	937	0	0
	938	0	0
	939	0	0
	940	0	0
	941	0	0
	942	0	0
	943	0	0
	944	0	0
	945	0	0
	946	0	0
	947	0	0
	948	0	0
	949	0	0
	950	0	0
	951	0	0
	952	0	0
	953	1	0
	954	0	0
	955	0	0
	956	0	0
	957	0	0
	958	0	0
	959	0	0
	960	0	0
	961	0	0
	962	0	0
	963	0	0
	964	0	0
	965	0	0
	966	0	0
	967	0	0
	968	0	0
	969	0	0
	970	0	0
	971	0	0
	972	0	0
	973	0	0
	974	0	0
	975	0	0
	976	0	0
	977	0	0
	978	0	0
	979	0	0
	980	0	0
	981	0	0
	982	0	0
	983	0	0
	984	0	0
	985	0	0
	986	0	0
	987	0	0
	988	0	0
	989	0	0
	990	0	0
	991	0	0
	992	0	0
	993	0	0
	994	0	0
	995	0	0
	996	0	0
	997	0	0
	998	0	0
	999	0	0
	1000	0	0

## Sheet: Fig2d
	WT males				WT females						COX14M19I males								Cox14M19I females
NK cells	1	0.705189	0.424528	1.01415	0.870283	0.860849	1.00472	0.70283	0.705189	0.683962	1.1816	1.23821	1.15802	1.08255	1.08019	1.14858	0.891509	1.16745	0.474057	0.485849	0.938679	1.06604	0.858491	1.13679	1.07075	0.957547
Resting NK cells	1	0.739521	0.356287	1	0.94012	0.913174	0.979042	0.751497	0.712575	0.628743	0.269461	1.36527	1.20958	1.13772	1.21856	1.28443	0.961078	1.30539	0.44012	0.479042	0.991018	1.06886	0.901198	1.01796	0.994012	1.02994
CD11b- NK cells	1	1.0184	0.803681	0.932515	0.95092	0.693252	0.858896	0.730061	0.711656	0.815951	1.94479	1.44172	1.06748	0.840491	1.51534	1.56442	1.35583	1.15337	0.656442	0.239264	1.21472	1.01227	0.90184	1.13497	1.08589	1.03681
Ly6C+ CD11b- NK cells	1	1.07692	0.730769	0.730769	1.17308	0.75	0.5	0.826923	0.865385	0.846154	1.23077	1.51923	1.01923	0.942308	1.92308	2.01923	1.90385	1.53846	0.519231	0.230769	1.76923	1.28846	1.34615	1.69231	1.19231	1.75
Ly6C+ CD11b- NK cells	1	1.34426	1.27049	0.740984	1.4918	0.959016	0.539344	1.18852	1.15574	1.09016	1.15574	1.18852	0.909836	0.942623	1.68033	1.62295	1.95082	1.38525	1.11475	0.613115	1.77869	1.2377	1.66393	1.63115	1.22131	1.93443
CD4- NKT cells	1	0.909814	0.851459	1.01592	1.3634	0.970822	1.14058	0.944297	0.962865	0.718833	0.877984	1.15385	1.37401	1.26525	1.41114	1.09284	0.976127	1.19098	0.732095	0.66313	1.45889	1.37931	1.32095	1.63395	1.03714	1.36074
Resting CD4- NKT cells	1	1.16667	0.458333	1	1.25	1.08333	0.566667	1.33333	0.916667	1	0.416667	1.08333	0.916667	1.5	2.83333	1.83333	1.41667	1.16667	0.658333	0.0200833	1.58333	1.5	1.66667	2.25	1.25	2.16667
Resting CD4- NKT cells	1	1.30514	0.731118	1.83988	2.00906	1.57704	1.33837	1.40181	1.2719	1	0.55287	1.92447	2.02115	2.44411	1.98792	1.61934	1.51662	1.67674	1.36254	0.60423	2.09063	2.00604	1.99396	2.15408	1.74622	2.2719
Resting CD8+ T cells	1	1.49627	0.820896	0.958955	1.25373	0.86194	0.615672	0.940299	1.02985	0.932836	0.902985	1.12313	1.55597	1.39925	1.56716	1.33582	1.02239	1.39179	1.16418	0.00671642	1.02239	1.24254	1.3097	1.40672	1.51119	1.20896
Resting CD8+ T cells	1	1.42126	1.24803	0.972441	0.834646	1.05906	0.740157	0.65748	0.69685	0.92126	0.507874	1.05118	1.35039	1.38976	1.18898	1.1063	1.03937	1.14567	1.0748	0.649606	0.885827	0.909449	1.14567	1.11024	1.00787	1.06299
Effector CD4- NKT cells	1	0.845688	1.13011	0.588502	0.502269	0.720121	0.818457	0.792738	0.863843	1	1.21331	0.543116	0.487141	0.279879	0.502269	0.685325	0.74584	0.662632	0.816944	1.21029	0.459909	0.497731	0.491679	0.419062	0.620272	0.369138
Macrophages	1	1.58824	1.48869	0.597285	0.900452	1.38914	3.46154	0.819005	1.23077	1.87783	0.542986	0.764706	0.511312	1.07692	1.21719	0.515837	0.782805	1.26697	0.692308	3.38914	0.280543	0.257919	0.78733	0.782805	0.375566	0.864253

## Sheet: Fig2g
	Retinal Thickness (mm)
	Age (weeks)	WT																																COX14M19I
	5	243	245.38	246.75	238.88	241.5	247.5	248.75	250.63	250.75	245.38	254.25	252.63		239.75	240.75	241.13	241.75						253.38	254	255.5	254.5	251.63	250.63					247.13	241.13	245.75	242.38	246.38	227	237.5	238.38	243.38	240.88	244.25	246.63	245.63	239	234.75	236.25
	15	250.63	251.38	255.75	243.38	250.88	243.5	247.63	248.63	242.38	251	244.38	250.5	252.88	254.25	248.38	256.13	253.75	245.38	252.38	248.5	253.75	249.63	252.13	252.63	248	241	242.25	253.75	252.5	255.5	253	250.5	221.88	228.5	233.13	226.13	229.25	227.38	224.13	221	225.38	229.38	225.63	228.75	239.25	232	231.25	229.38
	30	247.88	248.38	237.88	246.75	257.88	246.88	249.75	249.63	246	253.88	247.5	254.25	255.38	253	245.5	255.13	253	241.88	251.25	250	253	253.25	254.25	256.13		247.88	247.38	257.75		258.13	250.38	249.13	208.63	212.13	221.88	214.88	208.13	214.88	208.25	203.13	205.63	208.13	205.13	208	219.5	231	213.75	206.63
[truncated: 10 more columns]

## Sheet: Fig2h
	LVAW Thickness (mm)					Statistics										Ejection Fraction (%)					Statistics
	WT females	WT males	COX14M19I females	COX14M19I males		Number of families	1									WT females	WT males	COX14M19I females	COX14M19I males		Number of families	1
	1.30703	1.18063	1.3268	1.38448		Number of comparisons per family	6									56.7595	45.8226	49.9092	34.8463		Number of comparisons per family	6
	1.03988	1.17966	1.64741	1.51293		Alpha	0.05									47.596	34.4576	62.0261	52.2602		Alpha	0.05
	1.23047	1.00347	1.39224	1.47931												41.9324	39.1847	57.6105	46.3327
	1.17819	1.08875	1.27759	1.49612		Tukey's multiple comparisons test	Mean Diff.	95.00% CI of diff.	Below threshold?	Summary	Adjusted P Value					53.1543	38.7733	57.1546	61.06		Tukey's multiple comparisons test	Mean Diff.	95.00% CI of diff.	Below threshold?	Summary	Adjusted P Value
	1.04995	0.931948	1.34828	1.09267		WT females vs. WT males	-0.1114	-0.3139 to 0.09106	No	ns	0.4684	A-B				35.7632	35.2802	58.3962	44.5798		WT females vs. WT males	1.64	-6.159 to 9.438	No	ns	0.9439	A-B
	1.10574	1.03776	1.36293	1.31121		WT females vs. COX14M19I females	-0.4403	-0.6558 to -0.2248	Yes	****	<0.0001	A-C				45.9312	40.3634	57.4331	53.0817		WT females vs. COX14M19I females	-15.53	-23.83 to -7.229	Yes	****	<0.0001	A-C
	1.14757	1.30405	1.39224	1.77529		WT females vs. COX14M19I males	-0.432	-0.6475 to -0.2165	Yes	****	<0.0001	A-D				48.9766	49.6998	69.1159	58.007		WT females vs. COX14M19I males	-4.813	-13.11 to 3.487	No	ns	0.4221	A-D
	1.25901	1.53267	1.4284	1.16919		WT males vs. COX14M19I females	-0.3289	-0.5503 to -0.1075	Yes	**	0.0013	B-C				50.3109	63.425	62.804	49.608		WT males vs. COX14M19I females	-17.17	-25.69 to -8.642	Yes	****	<0.0001	B-C
	0.889313	1.15648	1.73812	1.75531		WT males vs. COX14M19I males	-0.3206	-0.5420 to -0.09927	Yes	**	0.0018	B-D				48.4711	48.7775	64.5276	65.6472		WT males vs. COX14M19I males	-6.453	-14.98 to 2.073	No	ns	0.198	B-D
	1.08306	1.4505	2.33868	1.59468		COX14M19I females vs. COX14M19I males	0.008273	-0.2251 to 0.2416	No	ns	0.9997	C-D				46.9908	54.0603	79.1181	47.7796		COX14M19I females vs. COX14M19I males	10.72	1.728 to 19.70	Yes	*	0.0134	C-D
	1.00665	1.16589	1.42377	1.62468												46.0233	37.2555	58.5323	42.3161
	1.01169	0.951955	1.47988	1.86119		Test details	Mean 1	Mean 2	Mean Diff.	SE of diff.	n1	n2	q	DF		47.0543	37.9701	70.9825	63.5041		Test details	Mean 1	Mean 2	Mean Diff.	SE of diff.	n1	n2	q	DF
	1.00733	1.64673				WT females vs. WT males	1.073	1.184	-0.1114	0.07629	17	15	2.065	52		41.9339	70.8569				WT females vs. WT males	46.77	45.13	1.64	2.938	17	15	0.7892	52
	0.900571	1.08855				WT females vs. COX14M19I females	1.073	1.513	-0.4403	0.08119	17	12	7.669	52		41.2801	37.3189				WT females vs. COX14M19I females	46.77	62.3	-15.53	3.127	17	12	7.022	52
	0.991079	1.04285				WT females vs. COX14M19I males	1.073	1.505	-0.432	0.08119	17	12	7.525	52		48.3938	43.7414				WT females vs. COX14M19I males	46.77	51.59	-4.813	3.127	17	12	2.177	52
	1.0006					WT males vs. COX14M19I females	1.184	1.513	-0.3289	0.0834	15	12	5.577	52		44.3738					WT males vs. COX14M19I females	45.13	62.3	-17.17	3.212	15	12	7.558	52
	1.02799					WT males vs. COX14M19I males	1.184	1.505	-0.3206	0.0834	15	12	5.437	52		50.1802					WT males vs. COX14M19I males	45.13	51.59	-6.453	3.212	15	12	2.841	52
						COX14M19I females vs. COX14M19I males	1.513	1.505	0.008273	0.08791	12	12	0.1331	52							COX14M19I females vs. COX14M19I males	62.3	51.59	10.72	3.386	12	12	4.475	52
						Compact letter display															Compact letter display
						WT males	A														WT males	A
						COX14M19I males	A														COX14M19I males	B
						WT females	B														WT females	B
						COX14M19I females	B														COX14M19I females	B

[truncated: 31 more sheets: Fig4c, Fig5a, Fig5b, Fig5d, Fig5e, Fig5f, Fig5g, Fig6, Fig7a, Fig7b, Fig7c, Fig7d, Fig7e, Fig7f, Fig7g, supFig1b, supFig1c, supFig2a, supFig2c, supFig2e …]
